# Supplementary material for: Conserving evolutionarily distinct species is critical to safeguard human well-being
Source: Sci Rep. 2021 Dec 17;11:24187. doi: 10.1038/s41598-021-03616-x (PMC8683420; doi:10.1038/s41598-021-03616-x)
Supplement: Supplementary file 2 — Supplementary Table S1. [file 41598_2021_3616_MOESM2_ESM.xlsx]

## Sheet: pβsim species full data
Pairwise benefits	Lower bound (95% CI)	Mean SES pβsim	Upper bound (95% CI)
Human food - Food additives	7.81036	7.83202	7.85369
Human food - Vertebrate food	5.58286	5.6121	5.64134
Human food - Invertebrate food	8.31243	8.34861	8.38479
Human food - Charcoal	6.24334	6.26343	6.28353
Human food - Fuelwood	8.82893	8.86104	8.89316
Human food - Biofuels	5.48762	5.50231	5.51699
Human food - Materials beads	3.22103	3.23723	3.25343
Human food - Materials cane	10.3692	10.4477	10.5263
Human food - Materials scents/essential oils	11.0024	11.0271	11.0518
Human food - Materials fibres	9.82839	9.85626	9.88413
Human food - Materials gum/resin	6.36424	6.39255	6.42085
Human food - Materials rubber	4.39004	4.41729	4.44454
Human food - Materials lipids	4.07987	4.10288	4.12589
Human food - Materials tannins and dyestuffs	8.12432	8.14754	8.17076
Human food - Materials wax	2.62799	2.63986	2.65173
Human food - Materials wood	16.2772	16.3128	16.3483
Human food - Medicines	4.29449	4.32478	4.35508
Human food - Symbolism/inspiration	2.72164	2.74238	2.76312
Human food - Smoking materials	2.9576	2.97103	2.98447
Human food - Invertebrate poisons	2.73463	2.74862	2.7626
Human food - Vertebrate poisons	11.925	11.9512	11.9775
Human food - Soil improvers	7.06979	7.10436	7.13892
Human food - Shelter/hedges	8.54283	8.56955	8.59627
Human food - Ornamental	9.98262	10.0168	10.051
Food additives - Vertebrate food	16.6231	16.6516	16.6801
Food additives - Invertebrate food	8.05773	8.0838	8.10986
Food additives - Charcoal	5.12689	5.14085	5.15481
Food additives - Fuelwood	8.13961	8.15992	8.18023
Food additives - Biofuels	3.44532	3.45586	3.4664
Food additives - Materials beads	5.58804	5.60212	5.6162
Food additives - Materials cane	6.10504	6.15229	6.19955
Food additives - Materials scents/essential oils	2.11773	2.13616	2.15458
Food additives - Materials fibres	7.62395	7.64489	7.66584
Food additives - Materials gum/resin	2.28591	2.30931	2.33272
Food additives - Materials rubber	6.34185	6.35926	6.37667
Food additives - Materials lipids	3.18962	3.20478	3.21995
Food additives - Materials tannins and dyestuffs	5.87842	5.89587	5.91332
Food additives - Materials wax	1.55101	1.55573	1.56045
Food additives - Materials wood	16.5426	16.5717	16.6007
Food additives - Medicines	2.6202	2.64719	2.67418
Food additives - Symbolism/inspiration	1.57418	1.59008	1.60598
Food additives - Smoking materials	3.00441	3.01777	3.03113
Food additives - Invertebrate poisons	1.91566	1.92558	1.93549
Food additives - Vertebrate poisons	7.81922	7.83854	7.85785
Food additives - Soil improvers	13.5281	13.5547	13.5813
Food additives - Shelter/hedges	7.91009	7.92986	7.94962
Food additives - Ornamental	7.68031	7.71192	7.74353
Vertebrate food - Invertebrate food	16.6091	16.6401	16.6711
Vertebrate food - Charcoal	12.3037	12.3265	12.3493
Vertebrate food - Fuelwood	17.7256	17.7562	17.7869
Vertebrate food - Biofuels	5.9773	6.00013	6.02296
Vertebrate food - Materials beads	14.9691	14.9924	15.0157
Vertebrate food - Materials cane	11.7361	11.7827	11.8293
Vertebrate food - Materials scents/essential oils	21.3767	21.4084	21.44
Vertebrate food - Materials fibres	18.5635	18.594	18.6245
Vertebrate food - Materials gum/resin	17.4987	17.5299	17.5612
Vertebrate food - Materials rubber	10.6653	10.687	10.7088
Vertebrate food - Materials lipids	14.9549	14.9793	15.0037
Vertebrate food - Materials tannins and dyestuffs	17.0614	17.0896	17.1178
Vertebrate food - Materials wax	7.64665	7.66319	7.67973
Vertebrate food - Materials wood	22.688	22.7268	22.7655
Vertebrate food - Medicines	7.85332	7.89079	7.92827
Vertebrate food - Symbolism/inspiration	11.6704	11.6887	11.707
Vertebrate food - Smoking materials	13.7724	13.7957	13.819
Vertebrate food - Invertebrate poisons	11.4158	11.435	11.4541
Vertebrate food - Vertebrate poisons	7.28746	7.31808	7.3487
Vertebrate food - Soil improvers	11.0876	11.1124	11.1372
Vertebrate food - Shelter/hedges	19.7342	19.7656	19.7971
Vertebrate food - Ornamental	13.6081	13.6549	13.7017
Invertebrate food - Charcoal	6.05927	6.07347	6.08766
Invertebrate food - Fuelwood	7.55829	7.57736	7.59642
Invertebrate food - Biofuels	4.89565	4.91029	4.92493
Invertebrate food - Materials beads	8.3814	8.39518	8.40896
Invertebrate food - Materials cane	7.76452	7.78961	7.81471
Invertebrate food - Materials scents/essential oils	9.55887	9.57834	9.5978
Invertebrate food - Materials fibres	10.8472	10.868	10.8888
Invertebrate food - Materials gum/resin	6.00329	6.026	6.04871
Invertebrate food - Materials rubber	4.73371	4.74759	4.76148
Invertebrate food - Materials lipids	8.47764	8.49116	8.50468
Invertebrate food - Materials tannins and dyestuffs	8.65928	8.67755	8.69581
Invertebrate food - Materials wax	7.61697	7.62788	7.63879
Invertebrate food - Materials wood	10.8676	10.8991	10.9306
Invertebrate food - Medicines	7.51701	7.5651	7.61318
Invertebrate food - Symbolism/inspiration	6.38526	6.3979	6.41053
Invertebrate food - Smoking materials	6.54022	6.55369	6.56716
Invertebrate food - Invertebrate poisons	5.03993	5.05093	5.06194
Invertebrate food - Vertebrate poisons	9.29325	9.32405	9.35484
Invertebrate food - Soil improvers	11.3557	11.3831	11.4105
Invertebrate food - Shelter/hedges	6.23603	6.25958	6.28313
Invertebrate food - Ornamental	6.345	6.38433	6.42366
Charcoal - Fuelwood	2.25936	2.27025	2.28115
Charcoal - Biofuels	2.90861	2.91421	2.91982
Charcoal - Materials beads	1.42654	1.43795	1.44936
Charcoal - Materials cane	7.47978	7.50129	7.52279
Charcoal - Materials scents/essential oils	7.76404	7.77848	7.79291
Charcoal - Materials fibres	7.06703	7.08508	7.10313
Charcoal - Materials gum/resin	7.36987	7.38298	7.3961
Charcoal - Materials rubber	2.63635	2.64427	2.65218
Charcoal - Materials lipids	3.62366	3.63648	3.6493
Charcoal - Materials tannins and dyestuffs	2.71796	2.73232	2.74669
Charcoal - Materials wax	3.60805	3.61453	3.62101
Charcoal - Materials wood	3.32264	3.35333	3.38402
Charcoal - Medicines	4.83167	4.86745	4.90322
Charcoal - Symbolism/inspiration	5.31338	5.32111	5.32884
Charcoal - Smoking materials	3.74515	3.75234	3.75954
Charcoal - Invertebrate poisons	2.14539	2.15031	2.15524
Charcoal - Vertebrate poisons	6.64591	6.66785	6.68979
Charcoal - Soil improvers	5.2195	5.24024	5.26097
Charcoal - Shelter/hedges	2.41018	2.42761	2.44505
Charcoal - Ornamental	6.95251	6.99061	7.02871
Fuelwood - Biofuels	6.0175	6.02653	6.03557
Fuelwood - Materials beads	6.01671	6.03128	6.04584
Fuelwood - Materials cane	8.1163	8.14397	8.17165
Fuelwood - Materials scents/essential oils	8.91766	8.93539	8.95312
Fuelwood - Materials fibres	7.18375	7.20248	7.22121
Fuelwood - Materials gum/resin	7.33847	7.35482	7.37116
Fuelwood - Materials rubber	6.84472	6.85622	6.86772
Fuelwood - Materials lipids	3.48758	3.50579	3.52401
Fuelwood - Materials tannins and dyestuffs	4.07529	4.09292	4.11055
Fuelwood - Materials wax	5.93716	5.94563	5.9541
Fuelwood - Materials wood	3.25503	3.2824	3.30978
Fuelwood - Medicines	7.42318	7.47289	7.5226
Fuelwood - Symbolism/inspiration	4.81541	4.82586	4.83632
Fuelwood - Smoking materials	7.3743	7.38601	7.39772
Fuelwood - Invertebrate poisons	5.92603	5.93568	5.94533
Fuelwood - Vertebrate poisons	10.3218	10.3495	10.3772
Fuelwood - Soil improvers	6.62534	6.65466	6.68399
Fuelwood - Shelter/hedges	2.94627	2.96864	2.99102
Fuelwood - Ornamental	10.0602	10.1058	10.1514
Biofuels - Materials beads	0.572551	0.580285	0.588018
Biofuels - Materials cane	6.51889	6.52978	6.54067
Biofuels - Materials scents/essential oils	4.74887	4.75833	4.76779
Biofuels - Materials fibres	4.71333	4.72425	4.73516
Biofuels - Materials gum/resin	6.23701	6.24704	6.25708
Biofuels - Materials rubber	2.7576	2.76701	2.77643
Biofuels - Materials lipids	0.989955	1.00204	1.01413
Biofuels - Materials tannins and dyestuffs	3.23353	3.24256	3.25159
Biofuels - Materials wax	1.14974	1.15419	1.15864
Biofuels - Materials wood	9.60944	9.6266	9.64377
Biofuels - Medicines	2.83514	2.85915	2.88317
Biofuels - Symbolism/inspiration	0.952701	0.959567	0.966433
Biofuels - Smoking materials	3.39695	3.4033	3.40965
Biofuels - Invertebrate poisons	0.976268	0.986052	0.995835
Biofuels - Vertebrate poisons	4.36466	4.37899	4.39332
Biofuels - Soil improvers	5.54032	5.55321	5.56609
Biofuels - Shelter/hedges	4.09796	4.10886	4.11975
Biofuels - Ornamental	2.31685	2.34532	2.37379
Materials beads - Materials cane	2.74601	2.77784	2.80967
Materials beads - Materials scents/essential oils	5.45098	5.4624	5.47382
Materials beads - Materials fibres	7.24736	7.26007	7.27279
Materials beads - Materials gum/resin	5.13322	5.14985	5.16649
Materials beads - Materials rubber	1.91983	1.93165	1.94348
Materials beads - Materials lipids	1.97903	1.98714	1.99526
Materials beads - Materials tannins and dyestuffs	3.40977	3.41852	3.42728
Materials beads - Materials wax	0.282457	0.291274	0.300091
Materials beads - Materials wood	7.50455	7.52248	7.54041
Materials beads - Medicines	3.87426	3.89688	3.91951
Materials beads - Symbolism/inspiration	0.0234791	0.0321391	0.040799
Materials beads - Smoking materials	3.88109	3.891	3.9009
Materials beads - Invertebrate poisons	1.44273	1.44888	1.45504
Materials beads - Vertebrate poisons	6.67	6.68426	6.69851
Materials beads - Soil improvers	8.74866	8.76482	8.78098
Materials beads - Shelter/hedges	4.87296	4.88477	4.89658
Materials beads - Ornamental	5.99006	6.01636	6.04266
Materials cane - Materials scents/essential oils	4.69643	4.73856	4.7807
Materials cane - Materials fibres	-1.3322	-1.27366	-1.21512
Materials cane - Materials gum/resin	8.91383	8.93915	8.96447
Materials cane - Materials rubber	9.04603	9.0591	9.07216
Materials cane - Materials lipids	5.12723	5.1591	5.19097
Materials cane - Materials tannins and dyestuffs	3.86798	3.89142	3.91485
Materials cane - Materials wax	5.18856	5.19676	5.20496
Materials cane - Materials wood	16.7291	16.7646	16.8001
Materials cane - Medicines	7.83575	7.89932	7.96288
Materials cane - Symbolism/inspiration	6.71977	6.73867	6.75757
Materials cane - Smoking materials	7.28905	7.30889	7.32874
Materials cane - Invertebrate poisons	8.50272	8.51774	8.53276
Materials cane - Vertebrate poisons	9.1219	9.17577	9.22964
Materials cane - Soil improvers	6.45629	6.49413	6.53198
Materials cane - Shelter/hedges	7.63624	7.66909	7.70195
Materials cane - Ornamental	7.31555	7.37799	7.44044
Materials scents/essential oils - Materials fibres	8.71045	8.72868	8.74692
Materials scents/essential oils - Materials gum/resin	2.95946	2.98411	3.00877
Materials scents/essential oils - Materials rubber	7.61498	7.62875	7.64252
Materials scents/essential oils - Materials lipids	5.46775	5.4814	5.49505
Materials scents/essential oils - Materials tannins and dyestuffs	8.61045	8.62551	8.64057
Materials scents/essential oils - Materials wax	3.40641	3.4121	3.4178
Materials scents/essential oils - Materials wood	14.472	14.4999	14.5278
Materials scents/essential oils - Medicines	4.62376	4.65327	4.68278
Materials scents/essential oils - Symbolism/inspiration	2.54284	2.55537	2.5679
Materials scents/essential oils - Smoking materials	5.9699	5.98174	5.99357
Materials scents/essential oils - Invertebrate poisons	3.72507	3.73359	3.7421
Materials scents/essential oils - Vertebrate poisons	8.17335	8.19366	8.21398
Materials scents/essential oils - Soil improvers	13.9798	14.0034	14.0271
Materials scents/essential oils - Shelter/hedges	9.16268	9.18007	9.19745
Materials scents/essential oils - Ornamental	7.80477	7.83837	7.87198
Materials fibres - Materials gum/resin	5.5205	5.53789	5.55528
Materials fibres - Materials rubber	6.40706	6.4237	6.44034
Materials fibres - Materials lipids	7.17062	7.1845	7.19838
Materials fibres - Materials tannins and dyestuffs	9.27227	9.28939	9.30651
Materials fibres - Materials wax	4.05829	4.06928	4.08027
Materials fibres - Materials wood	12.7709	12.8011	12.8313
Materials fibres - Medicines	10.919	10.9551	10.9913
Materials fibres - Symbolism/inspiration	5.08411	5.09592	5.10773
Materials fibres - Smoking materials	8.61536	8.6293	8.64323
Materials fibres - Invertebrate poisons	5.54067	5.55036	5.56006
Materials fibres - Vertebrate poisons	11.4791	11.5052	11.5312
Materials fibres - Soil improvers	11.5674	11.5918	11.6162
Materials fibres - Shelter/hedges	7.56246	7.58445	7.60644
Materials fibres - Ornamental	9.99474	10.0386	10.0824
Materials gum/resin - Materials rubber	4.13714	4.15244	4.16773
Materials gum/resin - Materials lipids	2.68304	2.70016	2.71728
Materials gum/resin - Materials tannins and dyestuffs	2.52637	2.5444	2.56242
Materials gum/resin - Materials wax	4.47644	4.48343	4.49042
Materials gum/resin - Materials wood	8.68733	8.71844	8.74956
Materials gum/resin - Medicines	3.10014	3.13772	3.17529
Materials gum/resin - Symbolism/inspiration	4.65318	4.66417	4.67517
Materials gum/resin - Smoking materials	6.84698	6.85807	6.86915
Materials gum/resin - Invertebrate poisons	4.68316	4.69225	4.70134
Materials gum/resin - Vertebrate poisons	9.21101	9.23945	9.26789
Materials gum/resin - Soil improvers	8.90985	8.93323	8.95662
Materials gum/resin - Shelter/hedges	3.41586	3.4405	3.46515
Materials gum/resin - Ornamental	8.75064	8.79365	8.83667
Materials rubber - Materials lipids	3.02707	3.04283	3.05858
Materials rubber - Materials tannins and dyestuffs	4.18193	4.19604	4.21014
Materials rubber - Materials wax	4.30868	4.3167	4.32472
Materials rubber - Materials wood	5.98263	6.01186	6.04108
Materials rubber - Medicines	1.63651	1.66942	1.70233
Materials rubber - Symbolism/inspiration	0.204693	0.220096	0.2355
Materials rubber - Smoking materials	0.0568887	0.0697759	0.0826631
Materials rubber - Invertebrate poisons	-0.151575	-0.139419	-0.127262
Materials rubber - Vertebrate poisons	3.43901	3.46335	3.48769
Materials rubber - Soil improvers	7.11289	7.13422	7.15554
Materials rubber - Shelter/hedges	3.5955	3.61271	3.62992
Materials rubber - Ornamental	5.83481	5.86837	5.90193
Materials lipids - Materials tannins and dyestuffs	3.6326	3.64499	3.65737
Materials lipids - Materials wax	0.309472	0.314751	0.320029
Materials lipids - Materials wood	8.21733	8.23831	8.2593
Materials lipids - Medicines	0.904558	0.936228	0.967899
Materials lipids - Symbolism/inspiration	1.05057	1.05974	1.06892
Materials lipids - Smoking materials	3.98457	3.99376	4.00294
Materials lipids - Invertebrate poisons	2.00043	2.00704	2.01364
Materials lipids - Vertebrate poisons	5.03887	5.05668	5.07448
Materials lipids - Soil improvers	9.53778	9.55776	9.57775
Materials lipids - Shelter/hedges	5.62698	5.64204	5.65711
Materials lipids - Ornamental	7.29884	7.32712	7.35541
Materials tannins and dyestuffs - Materials wax	3.17083	3.17741	3.18398
Materials tannins and dyestuffs - Materials wood	12.1066	12.13	12.1533
Materials tannins and dyestuffs - Medicines	2.35611	2.38418	2.41225
Materials tannins and dyestuffs - Symbolism/inspiration	3.4385	3.44842	3.45835
Materials tannins and dyestuffs - Smoking materials	2.93722	2.94679	2.95637
Materials tannins and dyestuffs - Invertebrate poisons	3.89866	3.90648	3.9143
Materials tannins and dyestuffs - Vertebrate poisons	8.41399	8.43502	8.45605
Materials tannins and dyestuffs - Soil improvers	11.4864	11.5081	11.5298
Materials tannins and dyestuffs - Shelter/hedges	5.55023	5.56747	5.58471
Materials tannins and dyestuffs - Ornamental	6.65377	6.68819	6.72261
Materials wax - Materials wood	7.42846	7.44265	7.45685
Materials wax - Medicines	0.486692	0.516347	0.546001
Materials wax - Symbolism/inspiration	1.33204	1.33641	1.34079
Materials wax - Smoking materials	2.59641	2.60036	2.60431
Materials wax - Invertebrate poisons	1.29209	1.29637	1.30064
Materials wax - Vertebrate poisons	4.54733	4.55668	4.56603
Materials wax - Soil improvers	5.75079	5.76057	5.77036
Materials wax - Shelter/hedges	5.76051	5.77013	5.77974
Materials wax - Ornamental	4.03165	4.05135	4.07105
Materials wood - Medicines	15.0685	15.1122	15.1559
Materials wood - Symbolism/inspiration	9.79192	9.81279	9.83367
Materials wood - Smoking materials	9.3836	9.40592	9.42823
Materials wood - Invertebrate poisons	7.29531	7.31122	7.32713
Materials wood - Vertebrate poisons	20.9311	20.9636	20.9961
Materials wood - Soil improvers	10.5412	10.5726	10.6041
Materials wood - Shelter/hedges	5.86318	5.8858	5.90841
Materials wood - Ornamental	18.8051	18.8525	18.8999
Medicines - Symbolism/inspiration	0.0391653	0.0747487	0.110332
Medicines - Smoking materials	1.62999	1.6457	1.66141
Medicines - Invertebrate poisons	-0.486714	-0.46156	-0.436406
Medicines - Vertebrate poisons	2.91012	2.93881	2.9675
Medicines - Soil improvers	5.80118	5.8393	5.87741
Medicines - Shelter/hedges	4.7834	4.81787	4.85233
Medicines - Ornamental	10.1527	10.1853	10.218
Symbolism/inspiration - Smoking materials	2.99498	3.00488	3.01478
Symbolism/inspiration - Invertebrate poisons	2.51955	2.52473	2.52992
Symbolism/inspiration - Vertebrate poisons	2.1966	2.21335	2.23009
Symbolism/inspiration - Soil improvers	6.74777	6.76312	6.77847
Symbolism/inspiration - Shelter/hedges	3.4296	3.44265	3.4557
Symbolism/inspiration - Ornamental	3.37915	3.40543	3.43172
Smoking materials - Invertebrate poisons	3.33094	3.33612	3.34131
Smoking materials - Vertebrate poisons	5.55909	5.57678	5.59446
Smoking materials - Soil improvers	10.2509	10.2687	10.2865
Smoking materials - Shelter/hedges	6.54703	6.56117	6.5753
Smoking materials - Ornamental	5.81445	5.84189	5.86933
Invertebrate poisons - Vertebrate poisons	3.4838	3.49774	3.51168
Invertebrate poisons - Soil improvers	7.46513	7.47877	7.49241
Invertebrate poisons - Shelter/hedges	5.47372	5.48428	5.49484
Invertebrate poisons - Ornamental	4.13494	4.16436	4.19377
Vertebrate poisons - Soil improvers	6.86173	6.89389	6.92606
Vertebrate poisons - Shelter/hedges	9.35164	9.37624	9.40084
Vertebrate poisons - Ornamental	4.53723	4.56425	4.59126
Soil improvers - Shelter/hedges	7.60094	7.62356	7.64618
Soil improvers - Ornamental	7.0123	7.0465	7.08071
Shelter/hedges - Ornamental	4.65223	4.68432	4.71641

## Sheet: pβsim species congeneric data
Categories	Lower bound (95% CI)	Mean SES pβsim	Upper bound (95% CI)
Human food - Food additives	7.185	7.208	7.231
Human food - Vertebrate food	5.59	5.622	5.654
Human food - Invertebrate food	8.57	8.609	8.649
Human food - Charcoal	6.874	6.896	6.917
Human food - Fuelwood	9.296	9.33	9.365
Human food - Biofuels	3.349	3.365	3.381
Human food - Materials beads	2.036	2.051	2.066
Human food - Materials cane	8.897	8.994	9.091
Human food - Materials scents/essential oils	11.032	11.057	11.083
Human food - Materials fibres	9.155	9.186	9.216
Human food - Materials gum/resin	7.039	7.069	7.098
Human food - Materials rubber	6.094	6.122	6.15
Human food - Materials lipids	4.256	4.279	4.302
Human food - Materials tannins and dyestuffs	7.728	7.753	7.778
Human food - Materials wax	2.678	2.691	2.703
Human food - Materials wood	17.087	17.125	17.163
Human food - Medicines	5.573	5.607	5.641
Human food - Symbolism/inspiration	2.55	2.571	2.593
Human food - Smoking materials	2.739	2.754	2.769
Human food - Invertebrate poisons	3.426	3.438	3.45
Human food - Vertebrate poisons	11.983	12.012	12.04
Human food - Soil improvers	7.298	7.337	7.376
Human food - Shelter/hedges	10.544	10.574	10.604
Human food - Ornamental	11.58	11.62	11.661
Food additives - Vertebrate food	16.675	16.703	16.732
Food additives - Invertebrate food	7.153	7.179	7.205
Food additives - Charcoal	5.483	5.498	5.512
Food additives - Fuelwood	7.442	7.462	7.482
Food additives - Biofuels	4.397	4.408	4.419
Food additives - Materials beads	5.025	5.039	5.053
Food additives - Materials cane	5.222	5.277	5.333
Food additives - Materials scents/essential oils	1.554	1.572	1.591
Food additives - Materials fibres	8.035	8.056	8.078
Food additives - Materials gum/resin	3.471	3.494	3.517
Food additives - Materials rubber	5.319	5.337	5.355
Food additives - Materials lipids	3.195	3.21	3.224
Food additives - Materials tannins and dyestuffs	5.341	5.359	5.377
Food additives - Materials wax	3.826	3.833	3.84
Food additives - Materials wood	17.31	17.339	17.369
Food additives - Medicines	3.043	3.075	3.107
Food additives - Symbolism/inspiration	1.992	2.008	2.024
Food additives - Smoking materials	2.339	2.354	2.369
Food additives - Invertebrate poisons	1.654	1.662	1.67
Food additives - Vertebrate poisons	6.811	6.831	6.851
Food additives - Soil improvers	14.896	14.923	14.951
Food additives - Shelter/hedges	7.503	7.523	7.543
Food additives - Ornamental	8.091	8.129	8.166
Vertebrate food - Invertebrate food	16.64	16.672	16.704
Vertebrate food - Charcoal	12.016	12.039	12.061
Vertebrate food - Fuelwood	17.289	17.32	17.35
Vertebrate food - Biofuels	4.469	4.493	4.518
Vertebrate food - Materials beads	13.338	13.36	13.383
Vertebrate food - Materials cane	11.035	11.091	11.147
Vertebrate food - Materials scents/essential oils	20.632	20.663	20.694
Vertebrate food - Materials fibres	17.671	17.702	17.734
Vertebrate food - Materials gum/resin	17.311	17.341	17.371
Vertebrate food - Materials rubber	9.446	9.468	9.49
Vertebrate food - Materials lipids	14.06	14.083	14.106
Vertebrate food - Materials tannins and dyestuffs	16.02	16.047	16.075
Vertebrate food - Materials wax	6.365	6.381	6.397
Vertebrate food - Materials wood	22.315	22.355	22.395
Vertebrate food - Medicines	8.394	8.435	8.477
Vertebrate food - Symbolism/inspiration	10.881	10.9	10.919
Vertebrate food - Smoking materials	11.483	11.504	11.524
Vertebrate food - Invertebrate poisons	10.184	10.2	10.216
Vertebrate food - Vertebrate poisons	7.004	7.034	7.064
Vertebrate food - Soil improvers	10.797	10.824	10.851
Vertebrate food - Shelter/hedges	19.408	19.441	19.474
Vertebrate food - Ornamental	14.652	14.707	14.763
Invertebrate food - Charcoal	5.95	5.964	5.978
Invertebrate food - Fuelwood	6.72	6.738	6.757
Invertebrate food - Biofuels	4.241	4.255	4.27
Invertebrate food - Materials beads	7.655	7.668	7.68
Invertebrate food - Materials cane	6.204	6.232	6.259
Invertebrate food - Materials scents/essential oils	7.974	7.993	8.013
Invertebrate food - Materials fibres	10.205	10.226	10.248
Invertebrate food - Materials gum/resin	5.764	5.789	5.813
Invertebrate food - Materials rubber	3.692	3.707	3.721
Invertebrate food - Materials lipids	7.929	7.942	7.955
Invertebrate food - Materials tannins and dyestuffs	8.661	8.678	8.696
Invertebrate food - Materials wax	6.71	6.72	6.73
Invertebrate food - Materials wood	11.399	11.432	11.465
Invertebrate food - Medicines	7.899	7.951	8.002
Invertebrate food - Symbolism/inspiration	6.033	6.045	6.056
Invertebrate food - Smoking materials	5.581	5.594	5.606
Invertebrate food - Invertebrate poisons	3.872	3.88	3.888
Invertebrate food - Vertebrate poisons	8.688	8.722	8.755
Invertebrate food - Soil improvers	10.509	10.538	10.566
Invertebrate food - Shelter/hedges	6.197	6.222	6.247
Invertebrate food - Ornamental	6.589	6.636	6.683
Charcoal - Fuelwood	1.991	2.003	2.015
Charcoal - Biofuels	3.015	3.021	3.026
Charcoal - Materials beads	0.767	0.777	0.788
Charcoal - Materials cane	6.388	6.412	6.436
Charcoal - Materials scents/essential oils	6.103	6.117	6.13
Charcoal - Materials fibres	6.424	6.443	6.462
Charcoal - Materials gum/resin	7.005	7.017	7.029
Charcoal - Materials rubber	1.485	1.493	1.501
Charcoal - Materials lipids	3.171	3.185	3.198
Charcoal - Materials tannins and dyestuffs	1.208	1.225	1.241
Charcoal - Materials wax	3.383	3.389	3.396
Charcoal - Materials wood	4.477	4.515	4.553
Charcoal - Medicines	5.236	5.277	5.317
Charcoal - Symbolism/inspiration	4.633	4.64	4.647
Charcoal - Smoking materials	2.306	2.313	2.32
Charcoal - Invertebrate poisons	2.811	2.815	2.82
Charcoal - Vertebrate poisons	7.513	7.537	7.56
Charcoal - Soil improvers	6.005	6.028	6.051
Charcoal - Shelter/hedges	3.384	3.402	3.421
Charcoal - Ornamental	9.523	9.569	9.616
Fuelwood - Biofuels	5.401	5.41	5.418
Fuelwood - Materials beads	4.974	4.984	4.994
Fuelwood - Materials cane	6.81	6.843	6.877
Fuelwood - Materials scents/essential oils	7.423	7.441	7.459
Fuelwood - Materials fibres	6.92	6.94	6.959
Fuelwood - Materials gum/resin	6.79	6.808	6.825
Fuelwood - Materials rubber	7.054	7.065	7.076
Fuelwood - Materials lipids	3.26	3.28	3.299
Fuelwood - Materials tannins and dyestuffs	2.925	2.944	2.962
Fuelwood - Materials wax	5.688	5.696	5.704
Fuelwood - Materials wood	2.783	2.812	2.841
Fuelwood - Medicines	7.775	7.828	7.881
Fuelwood - Symbolism/inspiration	4.156	4.165	4.175
Fuelwood - Smoking materials	5.937	5.948	5.959
Fuelwood - Invertebrate poisons	5.405	5.413	5.421
Fuelwood - Vertebrate poisons	10.055	10.084	10.113
Fuelwood - Soil improvers	5.223	5.254	5.286
Fuelwood - Shelter/hedges	1.977	2.001	2.025
Fuelwood - Ornamental	10.751	10.805	10.86
Biofuels - Materials beads	0.89	0.897	0.903
Biofuels - Materials cane	5.829	5.844	5.859
Biofuels - Materials scents/essential oils	4.076	4.085	4.094
Biofuels - Materials fibres	3.204	3.215	3.226
Biofuels - Materials gum/resin	5.329	5.339	5.348
Biofuels - Materials rubber	1.772	1.782	1.792
Biofuels - Materials lipids	0.713	0.725	0.738
Biofuels - Materials tannins and dyestuffs	3.301	3.31	3.319
Biofuels - Materials wax	0.478	0.483	0.487
Biofuels - Materials wood	9.149	9.166	9.183
Biofuels - Medicines	2.423	2.451	2.48
Biofuels - Symbolism/inspiration	-0.069	-0.061	-0.053
Biofuels - Smoking materials	2.275	2.28	2.286
Biofuels - Invertebrate poisons	-0.205	-0.198	-0.19
Biofuels - Vertebrate poisons	2.893	2.908	2.923
Biofuels - Soil improvers	4.137	4.15	4.163
Biofuels - Shelter/hedges	4.559	4.571	4.583
Biofuels - Ornamental	2.034	2.066	2.098
Materials beads - Materials cane	3.182	3.215	3.248
Materials beads - Materials scents/essential oils	4.005	4.016	4.026
Materials beads - Materials fibres	6.613	6.623	6.634
Materials beads - Materials gum/resin	4.435	4.443	4.451
Materials beads - Materials rubber	1.68	1.692	1.703
Materials beads - Materials lipids	1.131	1.14	1.148
Materials beads - Materials tannins and dyestuffs	3.179	3.187	3.195
Materials beads - Materials wax	0.416	0.425	0.434
Materials beads - Materials wood	8.057	8.075	8.093
Materials beads - Medicines	2.391	2.416	2.442
Materials beads - Symbolism/inspiration	-0.172	-0.163	-0.155
Materials beads - Smoking materials	2.543	2.552	2.56
Materials beads - Invertebrate poisons	2.036	2.04	2.044
Materials beads - Vertebrate poisons	5.118	5.132	5.146
Materials beads - Soil improvers	6.395	6.409	6.423
Materials beads - Shelter/hedges	4.865	4.877	4.888
Materials beads - Ornamental	7.669	7.701	7.733
Materials cane - Materials scents/essential oils	3.937	3.987	4.037
Materials cane - Materials fibres	-1.742	-1.673	-1.605
Materials cane - Materials gum/resin	8.649	8.679	8.709
Materials cane - Materials rubber	8.023	8.036	8.048
Materials cane - Materials lipids	2.875	2.916	2.957
Materials cane - Materials tannins and dyestuffs	2.758	2.787	2.817
Materials cane - Materials wax	4.731	4.739	4.747
Materials cane - Materials wood	14.501	14.541	14.582
Materials cane - Medicines	6.307	6.388	6.469
Materials cane - Symbolism/inspiration	5.596	5.619	5.641
Materials cane - Smoking materials	6.151	6.173	6.196
Materials cane - Invertebrate poisons	7.482	7.498	7.513
Materials cane - Vertebrate poisons	7.937	8.003	8.069
Materials cane - Soil improvers	3.68	3.718	3.755
Materials cane - Shelter/hedges	5.484	5.526	5.568
Materials cane - Ornamental	5.816	5.893	5.969
Materials scents/essential oils - Materials fibres	9.1	9.12	9.14
Materials scents/essential oils - Materials gum/resin	3.013	3.038	3.064
Materials scents/essential oils - Materials rubber	6.168	6.181	6.194
Materials scents/essential oils - Materials lipids	5.294	5.307	5.32
Materials scents/essential oils - Materials tannins and dyestuffs	7.753	7.769	7.784
Materials scents/essential oils - Materials wax	4.483	4.49	4.497
Materials scents/essential oils - Materials wood	14.897	14.926	14.954
Materials scents/essential oils - Medicines	3.779	3.807	3.836
Materials scents/essential oils - Symbolism/inspiration	2.349	2.362	2.375
Materials scents/essential oils - Smoking materials	5.234	5.246	5.258
Materials scents/essential oils - Invertebrate poisons	2.813	2.819	2.825
Materials scents/essential oils - Vertebrate poisons	8.473	8.494	8.515
Materials scents/essential oils - Soil improvers	13.716	13.739	13.763
Materials scents/essential oils - Shelter/hedges	8.521	8.538	8.555
Materials scents/essential oils - Ornamental	9.234	9.273	9.311
Materials fibres - Materials gum/resin	6.594	6.612	6.631
Materials fibres - Materials rubber	4.859	4.876	4.892
Materials fibres - Materials lipids	6.825	6.839	6.853
Materials fibres - Materials tannins and dyestuffs	9.097	9.115	9.132
Materials fibres - Materials wax	3.209	3.221	3.232
Materials fibres - Materials wood	12.287	12.321	12.354
Materials fibres - Medicines	10.507	10.55	10.592
Materials fibres - Symbolism/inspiration	5.106	5.118	5.131
Materials fibres - Smoking materials	7.873	7.887	7.9
Materials fibres - Invertebrate poisons	3.972	3.979	3.987
Materials fibres - Vertebrate poisons	10.43	10.457	10.485
Materials fibres - Soil improvers	11.543	11.571	11.599
Materials fibres - Shelter/hedges	6.197	6.22	6.243
Materials fibres - Ornamental	9.658	9.71	9.763
Materials gum/resin - Materials rubber	3.396	3.412	3.428
Materials gum/resin - Materials lipids	3.845	3.862	3.879
Materials gum/resin - Materials tannins and dyestuffs	2.842	2.86	2.878
Materials gum/resin - Materials wax	5.431	5.439	5.448
Materials gum/resin - Materials wood	8.377	8.411	8.444
Materials gum/resin - Medicines	4.576	4.615	4.654
Materials gum/resin - Symbolism/inspiration	4.533	4.544	4.555
Materials gum/resin - Smoking materials	6.046	6.056	6.067
Materials gum/resin - Invertebrate poisons	4.717	4.725	4.733
Materials gum/resin - Vertebrate poisons	9.782	9.811	9.84
Materials gum/resin - Soil improvers	9.146	9.17	9.193
Materials gum/resin - Shelter/hedges	3.963	3.989	4.015
Materials gum/resin - Ornamental	9.716	9.766	9.816
Materials rubber - Materials lipids	1.802	1.818	1.834
Materials rubber - Materials tannins and dyestuffs	2.895	2.91	2.924
Materials rubber - Materials wax	3.659	3.666	3.674
Materials rubber - Materials wood	6.077	6.109	6.14
Materials rubber - Medicines	1.97	2.005	2.041
Materials rubber - Symbolism/inspiration	0.275	0.291	0.307
Materials rubber - Smoking materials	0.6	0.612	0.625
Materials rubber - Invertebrate poisons	0.264	0.275	0.286
Materials rubber - Vertebrate poisons	3.018	3.043	3.068
Materials rubber - Soil improvers	7.323	7.345	7.366
Materials rubber - Shelter/hedges	4.441	4.458	4.476
Materials rubber - Ornamental	7.54	7.578	7.616
Materials lipids - Materials tannins and dyestuffs	3.138	3.15	3.161
Materials lipids - Materials wax	1.107	1.113	1.119
Materials lipids - Materials wood	9.044	9.066	9.087
Materials lipids - Medicines	1.026	1.055	1.085
Materials lipids - Symbolism/inspiration	0.12	0.13	0.139
Materials lipids - Smoking materials	3.236	3.245	3.253
Materials lipids - Invertebrate poisons	1.922	1.928	1.934
Materials lipids - Vertebrate poisons	4.787	4.805	4.822
Materials lipids - Soil improvers	9.715	9.735	9.755
Materials lipids - Shelter/hedges	5.612	5.627	5.642
Materials lipids - Ornamental	7.299	7.33	7.361
Materials tannins and dyestuffs - Materials wax	3.139	3.145	3.152
Materials tannins and dyestuffs - Materials wood	12.533	12.558	12.583
Materials tannins and dyestuffs - Medicines	3.226	3.257	3.289
Materials tannins and dyestuffs - Symbolism/inspiration	3.625	3.635	3.645
Materials tannins and dyestuffs - Smoking materials	0.739	0.75	0.761
Materials tannins and dyestuffs - Invertebrate poisons	3.402	3.409	3.416
Materials tannins and dyestuffs - Vertebrate poisons	7.683	7.705	7.727
Materials tannins and dyestuffs - Soil improvers	11.452	11.475	11.497
Materials tannins and dyestuffs - Shelter/hedges	6.187	6.206	6.225
Materials tannins and dyestuffs - Ornamental	6.519	6.56	6.6
Materials wax - Materials wood	6.404	6.417	6.429
Materials wax - Medicines	0.505	0.538	0.571
Materials wax - Symbolism/inspiration	0.503	0.508	0.512
Materials wax - Smoking materials	3.012	3.017	3.021
Materials wax - Invertebrate poisons	1.782	1.787	1.792
Materials wax - Vertebrate poisons	3.68	3.688	3.696
Materials wax - Soil improvers	6.806	6.817	6.829
Materials wax - Shelter/hedges	5.274	5.283	5.293
Materials wax - Ornamental	5.276	5.3	5.324
Materials wood - Medicines	14.663	14.713	14.764
Materials wood - Symbolism/inspiration	10.28	10.302	10.325
Materials wood - Smoking materials	9.156	9.179	9.201
Materials wood - Invertebrate poisons	8.301	8.317	8.334
Materials wood - Vertebrate poisons	21.268	21.303	21.338
Materials wood - Soil improvers	11.76	11.794	11.828
Materials wood - Shelter/hedges	7.023	7.049	7.074
Materials wood - Ornamental	20.278	20.337	20.396
Medicines - Symbolism/inspiration	0.316	0.355	0.394
Medicines - Smoking materials	0.367	0.386	0.404
Medicines - Invertebrate poisons	-0.623	-0.604	-0.585
Medicines - Vertebrate poisons	3.874	3.904	3.933
Medicines - Soil improvers	6.872	6.915	6.957
Medicines - Shelter/hedges	6.712	6.75	6.789
Medicines - Ornamental	10.759	10.797	10.834
Symbolism/inspiration - Smoking materials	2.615	2.624	2.634
Symbolism/inspiration - Invertebrate poisons	2.075	2.08	2.085
Symbolism/inspiration - Vertebrate poisons	2.32	2.337	2.354
Symbolism/inspiration - Soil improvers	6.973	6.989	7.005
Symbolism/inspiration - Shelter/hedges	4.399	4.413	4.427
Symbolism/inspiration - Ornamental	5.48	5.512	5.544
Smoking materials - Invertebrate poisons	2.326	2.33	2.334
Smoking materials - Vertebrate poisons	5.427	5.446	5.466
Smoking materials - Soil improvers	9.993	10.011	10.029
Smoking materials - Shelter/hedges	6.363	6.379	6.394
Smoking materials - Ornamental	4.297	4.329	4.361
Invertebrate poisons - Vertebrate poisons	1.971	1.986	2.001
Invertebrate poisons - Soil improvers	7.889	7.902	7.915
Invertebrate poisons - Shelter/hedges	5.304	5.313	5.323
Invertebrate poisons - Ornamental	4.547	4.582	4.617
Vertebrate poisons - Soil improvers	6.309	6.345	6.382
Vertebrate poisons - Shelter/hedges	8.442	8.468	8.493
Vertebrate poisons - Ornamental	3.997	4.027	4.057
Soil improvers - Shelter/hedges	7.337	7.362	7.386
Soil improvers - Ornamental	6.968	7.009	7.05
Shelter/hedges - Ornamental	5.403	5.441	5.48

## Sheet: pβsim genera full data
Pairwise benefits	Lower bound (95% CI)	Mean SES pβsim	Upper bound (95% CI)
Human food - Food additives	2.932	2.941	2.95
Human food - Vertebrate food	1.29	1.319	1.348
Human food - Invertebrate food	1.948	1.959	1.97
Human food - Charcoal	2.808	2.82	2.833
Human food - Fuelwood	2.3	2.32	2.34
Human food - Biofuels	2.624	2.63	2.635
Human food - Materials beads	0.552	0.581	0.609
Human food - Materials cane	2.175	2.182	2.19
Human food - Materials scents/essential oils	4.113	4.13	4.148
Human food - Materials fibres	3.552	3.571	3.59
Human food - Materials gum/resin	1.349	1.361	1.373
Human food - Materials rubber	0.746	0.755	0.763
Human food - Materials lipids	1.615	1.649	1.683
Human food - Materials tannins and dyestuffs	3.43	3.446	3.462
Human food - Materials wax	1.87	1.873	1.877
Human food - Materials wood	6.026	6.048	6.07
Human food - Medicines	-0.841	-0.824	-0.807
Human food - Symbolism/inspiration	0.433	0.435	0.437
Human food - Smoking materials	-0.128	-0.126	-0.124
Human food - Invertebrate poisons	0.225	0.251	0.277
Human food - Vertebrate poisons	5.098	5.12	5.142
Human food - Soil improvers	1.232	1.248	1.263
Human food - Shelter/hedges	3.007	3.02	3.034
Human food - Ornamental	0.986	1.004	1.022
Food additives - Vertebrate food	4.953	4.972	4.992
Food additives - Invertebrate food	3.555	3.571	3.587
Food additives - Charcoal	2.52	2.532	2.545
Food additives - Fuelwood	3.39	3.403	3.416
Food additives - Biofuels	1.514	1.519	1.524
Food additives - Materials beads	2.58	2.608	2.636
Food additives - Materials cane	1.585	1.59	1.594
Food additives - Materials scents/essential oils	1.468	1.489	1.51
Food additives - Materials fibres	2.394	2.405	2.416
Food additives - Materials gum/resin	0.419	0.429	0.439
Food additives - Materials rubber	3.003	3.023	3.043
Food additives - Materials lipids	1.332	1.354	1.376
Food additives - Materials tannins and dyestuffs	2.515	2.527	2.54
Food additives - Materials wax	0.298	0.3	0.301
Food additives - Materials wood	6.091	6.114	6.137
Food additives - Medicines	0.457	0.467	0.476
Food additives - Symbolism/inspiration	0	0.003	0.006
Food additives - Smoking materials	0.834	0.837	0.839
Food additives - Invertebrate poisons	0.556	0.576	0.596
Food additives - Vertebrate poisons	2.507	2.519	2.531
Food additives - Soil improvers	2.932	2.947	2.962
Food additives - Shelter/hedges	3.267	3.28	3.293
Food additives - Ornamental	1.07	1.089	1.108
Vertebrate food - Invertebrate food	7.845	7.874	7.903
Vertebrate food - Charcoal	7.332	7.352	7.373
Vertebrate food - Fuelwood	10.376	10.409	10.442
Vertebrate food - Biofuels	3.214	3.222	3.231
Vertebrate food - Materials beads	8.587	8.624	8.66
Vertebrate food - Materials cane	4.973	4.985	4.997
Vertebrate food - Materials scents/essential oils	11.684	11.719	11.755
Vertebrate food - Materials fibres	9.986	10.018	10.049
Vertebrate food - Materials gum/resin	9.273	9.301	9.329
Vertebrate food - Materials rubber	4.763	4.784	4.805
Vertebrate food - Materials lipids	7.974	7.996	8.018
Vertebrate food - Materials tannins and dyestuffs	8.952	8.976	9.001
Vertebrate food - Materials wax	4.844	4.851	4.859
Vertebrate food - Materials wood	9.901	9.933	9.965
Vertebrate food - Medicines	1.031	1.056	1.081
Vertebrate food - Symbolism/inspiration	6.58	6.594	6.607
Vertebrate food - Smoking materials	7.236	7.261	7.287
Vertebrate food - Invertebrate poisons	6.322	6.351	6.381
Vertebrate food - Vertebrate poisons	2.681	2.708	2.735
Vertebrate food - Soil improvers	7.098	7.122	7.147
Vertebrate food - Shelter/hedges	9.898	9.928	9.958
Vertebrate food - Ornamental	3.79	3.827	3.864
Invertebrate food - Charcoal	3.744	3.759	3.773
Invertebrate food - Fuelwood	4.811	4.827	4.844
Invertebrate food - Biofuels	2.675	2.683	2.691
Invertebrate food - Materials beads	4.696	4.716	4.737
Invertebrate food - Materials cane	4.296	4.309	4.323
Invertebrate food - Materials scents/essential oils	5.605	5.621	5.637
Invertebrate food - Materials fibres	5.496	5.516	5.535
Invertebrate food - Materials gum/resin	3.411	3.423	3.435
Invertebrate food - Materials rubber	1.842	1.857	1.873
Invertebrate food - Materials lipids	5.224	5.24	5.257
Invertebrate food - Materials tannins and dyestuffs	3.939	3.951	3.964
Invertebrate food - Materials wax	5.778	5.79	5.802
Invertebrate food - Materials wood	3.261	3.278	3.294
Invertebrate food - Medicines	2.457	2.477	2.497
Invertebrate food - Symbolism/inspiration	3.488	3.496	3.504
Invertebrate food - Smoking materials	3.314	3.33	3.346
Invertebrate food - Invertebrate poisons	2.851	2.873	2.895
Invertebrate food - Vertebrate poisons	3.768	3.785	3.802
Invertebrate food - Soil improvers	5.936	5.952	5.969
Invertebrate food - Shelter/hedges	1.918	1.928	1.938
Invertebrate food - Ornamental	1.053	1.067	1.081
Charcoal - Fuelwood	1.22	1.225	1.23
Charcoal - Biofuels	1.517	1.522	1.526
Charcoal - Materials beads	0.833	0.85	0.866
Charcoal - Materials cane	1.865	1.87	1.874
Charcoal - Materials scents/essential oils	5.02	5.037	5.053
Charcoal - Materials fibres	4.296	4.308	4.319
Charcoal - Materials gum/resin	4.073	4.087	4.1
Charcoal - Materials rubber	0.747	0.758	0.769
Charcoal - Materials lipids	1.925	1.931	1.937
Charcoal - Materials tannins and dyestuffs	1.728	1.734	1.741
Charcoal - Materials wax	3.036	3.044	3.051
Charcoal - Materials wood	0.282	0.287	0.292
Charcoal - Medicines	1.823	1.828	1.833
Charcoal - Symbolism/inspiration	3.52	3.528	3.537
Charcoal - Smoking materials	2.265	2.271	2.277
Charcoal - Invertebrate poisons	0.665	0.678	0.691
Charcoal - Vertebrate poisons	3.919	3.936	3.953
Charcoal - Soil improvers	2.157	2.166	2.175
Charcoal - Shelter/hedges	1.053	1.062	1.071
Charcoal - Ornamental	2.642	2.655	2.668
Fuelwood - Biofuels	3.365	3.374	3.384
Fuelwood - Materials beads	2.314	2.327	2.34
Fuelwood - Materials cane	2.9	2.907	2.915
Fuelwood - Materials scents/essential oils	4.596	4.611	4.627
Fuelwood - Materials fibres	3.691	3.705	3.719
Fuelwood - Materials gum/resin	3.824	3.841	3.858
Fuelwood - Materials rubber	3.535	3.548	3.561
Fuelwood - Materials lipids	0.98	0.988	0.996
Fuelwood - Materials tannins and dyestuffs	2.173	2.182	2.192
Fuelwood - Materials wax	4.138	4.147	4.156
Fuelwood - Materials wood	0.739	0.762	0.785
Fuelwood - Medicines	3.33	3.363	3.396
Fuelwood - Symbolism/inspiration	2.543	2.549	2.554
Fuelwood - Smoking materials	4.014	4.024	4.033
Fuelwood - Invertebrate poisons	3.203	3.219	3.235
Fuelwood - Vertebrate poisons	5.032	5.056	5.08
Fuelwood - Soil improvers	3.065	3.079	3.093
Fuelwood - Shelter/hedges	1.986	2	2.013
Fuelwood - Ornamental	3.993	4.019	4.044
Biofuels - Materials beads	-0.209	-0.199	-0.188
Biofuels - Materials cane	1.727	1.731	1.735
Biofuels - Materials scents/essential oils	2.112	2.12	2.128
Biofuels - Materials fibres	2.753	2.762	2.77
Biofuels - Materials gum/resin	3.062	3.071	3.08
Biofuels - Materials rubber	1.265	1.275	1.284
Biofuels - Materials lipids	0.418	0.42	0.422
Biofuels - Materials tannins and dyestuffs	1.567	1.57	1.574
Biofuels - Materials wax	1.275	1.277	1.279
Biofuels - Materials wood	4.388	4.402	4.416
Biofuels - Medicines	0.75	0.752	0.754
Biofuels - Symbolism/inspiration	-0.007	-0.004	-0.001
Biofuels - Smoking materials	2.061	2.067	2.072
Biofuels - Invertebrate poisons	0.49	0.512	0.535
Biofuels - Vertebrate poisons	2.366	2.372	2.379
Biofuels - Soil improvers	4.048	4.056	4.065
Biofuels - Shelter/hedges	1.797	1.801	1.806
Biofuels - Ornamental	1.009	1.013	1.017
Materials beads - Materials cane	-0.399	-0.395	-0.391
Materials beads - Materials scents/essential oils	2.699	2.715	2.73
Materials beads - Materials fibres	3.747	3.765	3.783
Materials beads - Materials gum/resin	0.492	0.508	0.525
Materials beads - Materials rubber	1.227	1.24	1.252
Materials beads - Materials lipids	0.472	0.481	0.49
Materials beads - Materials tannins and dyestuffs	0.738	0.756	0.774
Materials beads - Materials wax	-0.404	-0.377	-0.349
Materials beads - Materials wood	2.824	2.851	2.878
Materials beads - Medicines	1.936	1.978	2.02
Materials beads - Symbolism/inspiration	-0.006	-0.003	0
Materials beads - Smoking materials	2.614	2.634	2.653
Materials beads - Invertebrate poisons	0.565	0.582	0.599
Materials beads - Vertebrate poisons	3.73	3.747	3.764
Materials beads - Soil improvers	4.225	4.246	4.266
Materials beads - Shelter/hedges	2.037	2.056	2.076
Materials beads - Ornamental	1.837	1.865	1.892
Materials cane - Materials scents/essential oils	1.164	1.168	1.172
Materials cane - Materials fibres	-1.242	-1.236	-1.231
Materials cane - Materials gum/resin	3.306	3.313	3.32
Materials cane - Materials rubber	3.93	3.937	3.944
Materials cane - Materials lipids	1.864	1.869	1.875
Materials cane - Materials tannins and dyestuffs	2.21	2.216	2.222
Materials cane - Materials wax	2.623	2.626	2.629
Materials cane - Materials wood	7.072	7.087	7.101
Materials cane - Medicines	0.33	0.336	0.341
Materials cane - Symbolism/inspiration	1.168	1.17	1.172
Materials cane - Smoking materials	1.671	1.674	1.677
Materials cane - Invertebrate poisons	3.403	3.411	3.419
Materials cane - Vertebrate poisons	2.438	2.444	2.449
Materials cane - Soil improvers	4.407	4.418	4.43
Materials cane - Shelter/hedges	4.009	4.019	4.028
Materials cane - Ornamental	1.208	1.214	1.221
Materials scents/essential oils - Materials fibres	3.236	3.256	3.277
Materials scents/essential oils - Materials gum/resin	1.5	1.513	1.526
Materials scents/essential oils - Materials rubber	3.797	3.812	3.827
Materials scents/essential oils - Materials lipids	2.189	2.204	2.22
Materials scents/essential oils - Materials tannins and dyestuffs	4.456	4.471	4.487
Materials scents/essential oils - Materials wax	1.624	1.628	1.631
Materials scents/essential oils - Materials wood	6.499	6.526	6.553
Materials scents/essential oils - Medicines	2.656	2.713	2.769
Materials scents/essential oils - Symbolism/inspiration	1.662	1.666	1.671
Materials scents/essential oils - Smoking materials	2.974	2.981	2.989
Materials scents/essential oils - Invertebrate poisons	1.784	1.802	1.82
Materials scents/essential oils - Vertebrate poisons	2.351	2.367	2.384
Materials scents/essential oils - Soil improvers	6.445	6.467	6.49
Materials scents/essential oils - Shelter/hedges	4.462	4.479	4.496
Materials scents/essential oils - Ornamental	2.885	2.92	2.955
Materials fibres - Materials gum/resin	2.484	2.493	2.503
Materials fibres - Materials rubber	2.951	2.964	2.976
Materials fibres - Materials lipids	3.878	3.896	3.914
Materials fibres - Materials tannins and dyestuffs	5.486	5.501	5.516
Materials fibres - Materials wax	2.452	2.457	2.462
Materials fibres - Materials wood	5.452	5.468	5.484
Materials fibres - Medicines	4.45	4.47	4.491
Materials fibres - Symbolism/inspiration	2.412	2.418	2.423
Materials fibres - Smoking materials	4.702	4.717	4.731
Materials fibres - Invertebrate poisons	2.906	2.92	2.935
Materials fibres - Vertebrate poisons	4.815	4.83	4.846
Materials fibres - Soil improvers	5.843	5.861	5.878
Materials fibres - Shelter/hedges	2.912	2.93	2.948
Materials fibres - Ornamental	3.869	3.898	3.927
Materials gum/resin - Materials rubber	0.58	0.593	0.607
Materials gum/resin - Materials lipids	0.587	0.598	0.608
Materials gum/resin - Materials tannins and dyestuffs	0.289	0.296	0.302
Materials gum/resin - Materials wax	2.461	2.466	2.471
Materials gum/resin - Materials wood	4.219	4.23	4.241
Materials gum/resin - Medicines	0.652	0.672	0.692
Materials gum/resin - Symbolism/inspiration	2.176	2.181	2.187
Materials gum/resin - Smoking materials	2.777	2.786	2.795
Materials gum/resin - Invertebrate poisons	1.427	1.444	1.461
Materials gum/resin - Vertebrate poisons	4.145	4.163	4.181
Materials gum/resin - Soil improvers	3.674	3.687	3.7
Materials gum/resin - Shelter/hedges	1.355	1.365	1.374
Materials gum/resin - Ornamental	1.881	1.902	1.924
Materials rubber - Materials lipids	1.531	1.546	1.56
Materials rubber - Materials tannins and dyestuffs	1.812	1.827	1.841
Materials rubber - Materials wax	3.294	3.301	3.308
Materials rubber - Materials wood	1.498	1.529	1.561
Materials rubber - Medicines	-0.901	-0.892	-0.883
Materials rubber - Symbolism/inspiration	-1.237	-1.223	-1.209
Materials rubber - Smoking materials	-1.164	-1.15	-1.136
Materials rubber - Invertebrate poisons	-2.042	-2.023	-2.004
Materials rubber - Vertebrate poisons	1.017	1.045	1.072
Materials rubber - Soil improvers	2.404	2.424	2.444
Materials rubber - Shelter/hedges	1.262	1.28	1.299
Materials rubber - Ornamental	0.548	0.587	0.626
Materials lipids - Materials tannins and dyestuffs	1.471	1.485	1.498
Materials lipids - Materials wax	0.041	0.042	0.044
Materials lipids - Materials wood	2.828	2.853	2.877
Materials lipids - Medicines	-0.351	-0.29	-0.229
Materials lipids - Symbolism/inspiration	0.395	0.397	0.399
Materials lipids - Smoking materials	2.04	2.055	2.07
Materials lipids - Invertebrate poisons	1.067	1.077	1.087
Materials lipids - Vertebrate poisons	1.487	1.509	1.531
Materials lipids - Soil improvers	4.352	4.37	4.388
Materials lipids - Shelter/hedges	2.425	2.44	2.456
Materials lipids - Ornamental	2.362	2.4	2.438
Materials tannins and dyestuffs - Materials wax	2.121	2.125	2.13
Materials tannins and dyestuffs - Materials wood	5.536	5.554	5.572
Materials tannins and dyestuffs - Medicines	0.168	0.195	0.222
Materials tannins and dyestuffs - Symbolism/inspiration	1.823	1.827	1.83
Materials tannins and dyestuffs - Smoking materials	1.077	1.08	1.084
Materials tannins and dyestuffs - Invertebrate poisons	2.266	2.279	2.293
Materials tannins and dyestuffs - Vertebrate poisons	4.327	4.343	4.359
Materials tannins and dyestuffs - Soil improvers	5.875	5.896	5.918
Materials tannins and dyestuffs - Shelter/hedges	3.244	3.257	3.27
Materials tannins and dyestuffs - Ornamental	2.574	2.598	2.623
Materials wax - Materials wood	4.407	4.413	4.419
Materials wax - Medicines	-0.626	-0.625	-0.624
Materials wax - Symbolism/inspiration	0.622	0.623	0.625
Materials wax - Smoking materials	1.633	1.636	1.639
Materials wax - Invertebrate poisons	1.209	1.212	1.216
Materials wax - Vertebrate poisons	2.923	2.928	2.934
Materials wax - Soil improvers	3.784	3.792	3.799
Materials wax - Shelter/hedges	4.095	4.103	4.111
Materials wax - Ornamental	2.87	2.875	2.879
Materials wood - Medicines	6.463	6.494	6.525
Materials wood - Symbolism/inspiration	3.682	3.69	3.697
Materials wood - Smoking materials	3.65	3.678	3.707
Materials wood - Invertebrate poisons	3.316	3.338	3.359
Materials wood - Vertebrate poisons	8.231	8.259	8.287
Materials wood - Soil improvers	1.552	1.567	1.582
Materials wood - Shelter/hedges	0.443	0.452	0.462
Materials wood - Ornamental	6.34	6.371	6.402
Medicines - Symbolism/inspiration	-1.154	-1.152	-1.151
Medicines - Smoking materials	0.866	0.87	0.874
Medicines - Invertebrate poisons	-0.555	-0.477	-0.4
Medicines - Vertebrate poisons	1.022	1.061	1.099
Medicines - Soil improvers	-0.719	-0.699	-0.679
Medicines - Shelter/hedges	1.091	1.11	1.128
Medicines - Ornamental	0.781	0.802	0.823
Symbolism/inspiration - Smoking materials	2.063	2.068	2.072
Symbolism/inspiration - Invertebrate poisons	1.728	1.732	1.736
Symbolism/inspiration - Vertebrate poisons	1.538	1.542	1.546
Symbolism/inspiration - Soil improvers	3.203	3.211	3.219
Symbolism/inspiration - Shelter/hedges	1.084	1.087	1.09
Symbolism/inspiration - Ornamental	0.731	0.741	0.751
Smoking materials - Invertebrate poisons	1.871	1.877	1.884
Smoking materials - Vertebrate poisons	2.973	2.985	2.998
Smoking materials - Soil improvers	5.117	5.132	5.147
Smoking materials - Shelter/hedges	2.981	2.996	3.011
Smoking materials - Ornamental	1.407	1.437	1.468
Invertebrate poisons - Vertebrate poisons	1.875	1.883	1.892
Invertebrate poisons - Soil improvers	3.558	3.58	3.602
Invertebrate poisons - Shelter/hedges	3.052	3.07	3.088
Invertebrate poisons - Ornamental	1.237	1.272	1.307
Vertebrate poisons - Soil improvers	2.575	2.594	2.614
Vertebrate poisons - Shelter/hedges	4.926	4.949	4.971
Vertebrate poisons - Ornamental	0.454	0.478	0.503
Soil improvers - Shelter/hedges	4.197	4.213	4.229
Soil improvers - Ornamental	1.267	1.291	1.315
Shelter/hedges - Ornamental	1.55	1.572	1.594

## Sheet: pβsim genera congeneric data
Pairwise benefits	Lower bound (95% CI)	Mean SES pβsim	Upper bound (95% CI)
Human food - Food additives	2.07	2.072	2.075
Human food - Vertebrate food	0.549	0.561	0.574
Human food - Invertebrate food	1.501	1.506	1.51
Human food - Charcoal	2.703	2.708	2.712
Human food - Fuelwood	1.746	1.761	1.775
Human food - Biofuels	0.862	0.863	0.864
Human food - Materials beads	0.014	0.022	0.03
Human food - Materials cane	0.011	0.014	0.016
Human food - Materials scents/essential oils	3.225	3.228	3.232
Human food - Materials fibres	2.371	2.386	2.4
Human food - Materials gum/resin	0.908	0.921	0.933
Human food - Materials rubber	1.871	1.88	1.888
Human food - Materials lipids	1.422	1.424	1.425
Human food - Materials tannins and dyestuffs	2.275	2.282	2.29
Human food - Materials wax	1.773	1.774	1.775
Human food - Materials wood	5.204	5.215	5.227
Human food - Medicines	-0.184	-0.172	-0.161
Human food - Symbolism/inspiration	0.093	0.094	0.095
Human food - Smoking materials	-0.451	-0.449	-0.448
Human food - Invertebrate poisons	0.734	0.736	0.737
Human food - Vertebrate poisons	4.126	4.136	4.145
Human food - Soil improvers	0.681	0.689	0.696
Human food - Shelter/hedges	3.645	3.654	3.664
Human food - Ornamental	0.877	0.89	0.903
Food additives - Vertebrate food	3.741	3.749	3.757
Food additives - Invertebrate food	2.136	2.138	2.141
Food additives - Charcoal	2.325	2.333	2.341
Food additives - Fuelwood	2.202	2.208	2.215
Food additives - Biofuels	1.955	1.957	1.959
Food additives - Materials beads	2.063	2.089	2.114
Food additives - Materials cane	0.248	0.249	0.25
Food additives - Materials scents/essential oils	1.09	1.092	1.094
Food additives - Materials fibres	2.212	2.223	2.233
Food additives - Materials gum/resin	0.894	0.903	0.912
Food additives - Materials rubber	1.711	1.725	1.739
Food additives - Materials lipids	1.108	1.111	1.113
Food additives - Materials tannins and dyestuffs	1.458	1.469	1.48
Food additives - Materials wax	2.331	2.332	2.334
Food additives - Materials wood	5.458	5.472	5.485
Food additives - Medicines	1.963	1.965	1.967
Food additives - Symbolism/inspiration	0.729	0.73	0.731
Food additives - Smoking materials	0.409	0.409	0.41
Food additives - Invertebrate poisons	0.394	0.396	0.398
Food additives - Vertebrate poisons	1.423	1.429	1.435
Food additives - Soil improvers	3.679	3.687	3.695
Food additives - Shelter/hedges	2.228	2.24	2.251
Food additives - Ornamental	0.124	0.141	0.158
Vertebrate food - Invertebrate food	6.471	6.479	6.487
Vertebrate food - Charcoal	6.407	6.412	6.416
Vertebrate food - Fuelwood	8.21	8.218	8.227
Vertebrate food - Biofuels	1.719	1.721	1.722
Vertebrate food - Materials beads	6.827	6.847	6.868
Vertebrate food - Materials cane	4.396	4.399	4.402
Vertebrate food - Materials scents/essential oils	9.389	9.4	9.411
Vertebrate food - Materials fibres	8.782	8.798	8.813
Vertebrate food - Materials gum/resin	7.737	7.752	7.766
Vertebrate food - Materials rubber	3.25	3.265	3.28
Vertebrate food - Materials lipids	6.826	6.832	6.838
Vertebrate food - Materials tannins and dyestuffs	7.065	7.079	7.094
Vertebrate food - Materials wax	3.219	3.221	3.224
Vertebrate food - Materials wood	6.978	6.994	7.011
Vertebrate food - Medicines	-0.29	-0.275	-0.261
Vertebrate food - Symbolism/inspiration	5.508	5.512	5.516
Vertebrate food - Smoking materials	4.613	4.62	4.626
Vertebrate food - Invertebrate poisons	4.956	4.965	4.974
Vertebrate food - Vertebrate poisons	2.06	2.066	2.072
Vertebrate food - Soil improvers	6.783	6.792	6.802
Vertebrate food - Shelter/hedges	7.424	7.436	7.447
Vertebrate food - Ornamental	1.691	1.701	1.71
Invertebrate food - Charcoal	3.324	3.326	3.329
Invertebrate food - Fuelwood	3.481	3.488	3.495
Invertebrate food - Biofuels	1.8	1.804	1.807
Invertebrate food - Materials beads	4.305	4.313	4.321
Invertebrate food - Materials cane	3.007	3.01	3.013
Invertebrate food - Materials scents/essential oils	3.658	3.663	3.668
Invertebrate food - Materials fibres	4.303	4.314	4.325
Invertebrate food - Materials gum/resin	3.142	3.15	3.158
Invertebrate food - Materials rubber	0.797	0.809	0.82
Invertebrate food - Materials lipids	4.336	4.342	4.348
Invertebrate food - Materials tannins and dyestuffs	3.717	3.721	3.725
Invertebrate food - Materials wax	4.645	4.649	4.652
Invertebrate food - Materials wood	2.462	2.467	2.472
Invertebrate food - Medicines	1.999	2.001	2.003
Invertebrate food - Symbolism/inspiration	2.983	2.987	2.992
Invertebrate food - Smoking materials	2.456	2.459	2.463
Invertebrate food - Invertebrate poisons	1.834	1.839	1.844
Invertebrate food - Vertebrate poisons	2.669	2.674	2.68
Invertebrate food - Soil improvers	4.142	4.147	4.153
Invertebrate food - Shelter/hedges	1.441	1.45	1.459
Invertebrate food - Ornamental	0.472	0.481	0.489
Charcoal - Fuelwood	1.239	1.241	1.244
Charcoal - Biofuels	1.579	1.581	1.583
Charcoal - Materials beads	0.403	0.412	0.42
Charcoal - Materials cane	0.249	0.25	0.252
Charcoal - Materials scents/essential oils	3.175	3.177	3.179
Charcoal - Materials fibres	3.486	3.491	3.496
Charcoal - Materials gum/resin	3.61	3.616	3.621
Charcoal - Materials rubber	-0.32	-0.311	-0.302
Charcoal - Materials lipids	1.458	1.46	1.462
Charcoal - Materials tannins and dyestuffs	0.615	0.617	0.618
Charcoal - Materials wax	2.95	2.954	2.959
Charcoal - Materials wood	1.261	1.263	1.265
Charcoal - Medicines	1.71	1.712	1.713
Charcoal - Symbolism/inspiration	2.804	2.811	2.817
Charcoal - Smoking materials	0.766	0.767	0.768
Charcoal - Invertebrate poisons	1.469	1.472	1.475
Charcoal - Vertebrate poisons	4.412	4.416	4.42
Charcoal - Soil improvers	2.835	2.84	2.844
Charcoal - Shelter/hedges	2.062	2.072	2.083
Charcoal - Ornamental	3.626	3.629	3.633
Fuelwood - Biofuels	2.591	2.594	2.597
Fuelwood - Materials beads	1.211	1.216	1.222
Fuelwood - Materials cane	1.703	1.704	1.704
Fuelwood - Materials scents/essential oils	2.768	2.774	2.779
Fuelwood - Materials fibres	2.897	2.904	2.911
Fuelwood - Materials gum/resin	2.811	2.82	2.829
Fuelwood - Materials rubber	3.466	3.473	3.479
Fuelwood - Materials lipids	0.274	0.28	0.286
Fuelwood - Materials tannins and dyestuffs	0.897	0.903	0.909
Fuelwood - Materials wax	3.717	3.717	3.718
Fuelwood - Materials wood	-0.056	-0.053	-0.051
Fuelwood - Medicines	2.44	2.444	2.448
Fuelwood - Symbolism/inspiration	1.939	1.941	1.943
Fuelwood - Smoking materials	2.819	2.822	2.826
Fuelwood - Invertebrate poisons	2.655	2.657	2.66
Fuelwood - Vertebrate poisons	4.281	4.29	4.299
Fuelwood - Soil improvers	1.038	1.05	1.062
Fuelwood - Shelter/hedges	0.842	0.853	0.865
Fuelwood - Ornamental	3.155	3.18	3.205
Biofuels - Materials beads	0.043	0.045	0.047
Biofuels - Materials cane	-0.063	-0.063	-0.062
Biofuels - Materials scents/essential oils	1.119	1.121	1.123
Biofuels - Materials fibres	1.103	1.106	1.109
Biofuels - Materials gum/resin	2.151	2.154	2.157
Biofuels - Materials rubber	0.205	0.215	0.225
Biofuels - Materials lipids	-0.014	-0.012	-0.011
Biofuels - Materials tannins and dyestuffs	1.401	1.402	1.403
Biofuels - Materials wax	0.51	0.511	0.511
Biofuels - Materials wood	3.053	3.061	3.068
Biofuels - Medicines	0.186	0.187	0.188
Biofuels - Symbolism/inspiration	-1.123	-1.121	-1.118
Biofuels - Smoking materials	0.771	0.774	0.776
Biofuels - Invertebrate poisons	-0.705	-0.7	-0.696
Biofuels - Vertebrate poisons	0.893	0.895	0.896
Biofuels - Soil improvers	2.664	2.665	2.667
Biofuels - Shelter/hedges	1.995	1.997	2
Biofuels - Ornamental	-0.026	-0.025	-0.024
Materials beads - Materials cane	-1.122	-1.121	-1.119
Materials beads - Materials scents/essential oils	1.62	1.623	1.625
Materials beads - Materials fibres	3.169	3.174	3.179
Materials beads - Materials gum/resin	-0.17	-0.164	-0.158
Materials beads - Materials rubber	1.245	1.256	1.267
Materials beads - Materials lipids	-0.166	-0.165	-0.163
Materials beads - Materials tannins and dyestuffs	0.636	0.644	0.651
Materials beads - Materials wax	-0.351	-0.322	-0.293
Materials beads - Materials wood	3.187	3.197	3.208
Materials beads - Medicines	1.255	1.301	1.346
Materials beads - Symbolism/inspiration	0.103	0.104	0.105
Materials beads - Smoking materials	1.517	1.536	1.555
Materials beads - Invertebrate poisons	1.21	1.212	1.215
Materials beads - Vertebrate poisons	2.28	2.289	2.298
Materials beads - Soil improvers	2.442	2.446	2.451
Materials beads - Shelter/hedges	2.135	2.139	2.143
Materials beads - Ornamental	2.283	2.295	2.307
Materials cane - Materials scents/essential oils	0.309	0.31	0.311
Materials cane - Materials fibres	-1.377	-1.375	-1.373
Materials cane - Materials gum/resin	2.702	2.706	2.711
Materials cane - Materials rubber	2.626	2.632	2.638
Materials cane - Materials lipids	-0.187	-0.185	-0.184
Materials cane - Materials tannins and dyestuffs	1.228	1.23	1.231
Materials cane - Materials wax	1.41	1.41	1.411
Materials cane - Materials wood	4.08	4.083	4.086
Materials cane - Medicines	-2.012	-2.008	-2.005
Materials cane - Symbolism/inspiration	-0.853	-0.852	-0.851
Materials cane - Smoking materials	0.069	0.071	0.072
Materials cane - Invertebrate poisons	1.899	1.902	1.904
Materials cane - Vertebrate poisons	0.753	0.755	0.756
Materials cane - Soil improvers	3.092	3.095	3.098
Materials cane - Shelter/hedges	1.952	1.954	1.955
Materials cane - Ornamental	-0.729	-0.724	-0.719
Materials scents/essential oils - Materials fibres	2.881	2.889	2.897
Materials scents/essential oils - Materials gum/resin	0.928	0.936	0.944
Materials scents/essential oils - Materials rubber	2.259	2.269	2.278
Materials scents/essential oils - Materials lipids	1.664	1.666	1.668
Materials scents/essential oils - Materials tannins and dyestuffs	3.076	3.082	3.087
Materials scents/essential oils - Materials wax	2.426	2.427	2.429
Materials scents/essential oils - Materials wood	5.099	5.105	5.11
Materials scents/essential oils - Medicines	3.361	3.364	3.367
Materials scents/essential oils - Symbolism/inspiration	1.748	1.75	1.752
Materials scents/essential oils - Smoking materials	2.291	2.294	2.298
Materials scents/essential oils - Invertebrate poisons	0.928	0.93	0.933
Materials scents/essential oils - Vertebrate poisons	2.396	2.4	2.404
Materials scents/essential oils - Soil improvers	5.588	5.594	5.599
Materials scents/essential oils - Shelter/hedges	3.7	3.704	3.709
Materials scents/essential oils - Ornamental	3.312	3.318	3.325
Materials fibres - Materials gum/resin	2.906	2.912	2.919
Materials fibres - Materials rubber	1.497	1.509	1.52
Materials fibres - Materials lipids	3.389	3.401	3.413
Materials fibres - Materials tannins and dyestuffs	4.807	4.814	4.821
Materials fibres - Materials wax	1.534	1.535	1.536
Materials fibres - Materials wood	3.864	3.875	3.887
Materials fibres - Medicines	3.264	3.285	3.307
Materials fibres - Symbolism/inspiration	2.143	2.146	2.148
Materials fibres - Smoking materials	3.333	3.343	3.353
Materials fibres - Invertebrate poisons	1.465	1.47	1.474
Materials fibres - Vertebrate poisons	3.431	3.442	3.453
Materials fibres - Soil improvers	5.158	5.168	5.179
Materials fibres - Shelter/hedges	1.596	1.61	1.623
Materials fibres - Ornamental	2.589	2.611	2.633
Materials gum/resin - Materials rubber	0.132	0.144	0.156
Materials gum/resin - Materials lipids	0.414	0.421	0.427
Materials gum/resin - Materials tannins and dyestuffs	-0.356	-0.349	-0.343
Materials gum/resin - Materials wax	3.346	3.349	3.352
Materials gum/resin - Materials wood	3.129	3.135	3.141
Materials gum/resin - Medicines	0.957	0.975	0.993
Materials gum/resin - Symbolism/inspiration	1.936	1.939	1.943
Materials gum/resin - Smoking materials	1.973	1.976	1.979
Materials gum/resin - Invertebrate poisons	1.731	1.735	1.739
Materials gum/resin - Vertebrate poisons	4.104	4.116	4.127
Materials gum/resin - Soil improvers	3.151	3.159	3.167
Materials gum/resin - Shelter/hedges	1.374	1.382	1.391
Materials gum/resin - Ornamental	0.527	0.548	0.568
Materials rubber - Materials lipids	0.563	0.576	0.588
Materials rubber - Materials tannins and dyestuffs	0.616	0.627	0.637
Materials rubber - Materials wax	2.56	2.566	2.573
Materials rubber - Materials wood	1.14	1.171	1.202
Materials rubber - Medicines	-0.257	-0.248	-0.24
Materials rubber - Symbolism/inspiration	-0.908	-0.896	-0.884
Materials rubber - Smoking materials	-0.631	-0.621	-0.611
Materials rubber - Invertebrate poisons	-1.775	-1.761	-1.748
Materials rubber - Vertebrate poisons	0.637	0.66	0.683
Materials rubber - Soil improvers	2.137	2.151	2.166
Materials rubber - Shelter/hedges	2.054	2.067	2.08
Materials rubber - Ornamental	0.908	0.939	0.97
Materials lipids - Materials tannins and dyestuffs	0.705	0.706	0.708
Materials lipids - Materials wax	0.885	0.886	0.888
Materials lipids - Materials wood	2.612	2.617	2.622
Materials lipids - Medicines	-0.5	-0.499	-0.498
Materials lipids - Symbolism/inspiration	-0.332	-0.33	-0.328
Materials lipids - Smoking materials	1.231	1.233	1.236
Materials lipids - Invertebrate poisons	0.936	0.94	0.943
Materials lipids - Vertebrate poisons	0.843	0.845	0.848
Materials lipids - Soil improvers	3.878	3.882	3.886
Materials lipids - Shelter/hedges	2.173	2.176	2.179
Materials lipids - Ornamental	1.253	1.255	1.258
Materials tannins and dyestuffs - Materials wax	2.052	2.054	2.056
Materials tannins and dyestuffs - Materials wood	4.806	4.812	4.817
Materials tannins and dyestuffs - Medicines	1.382	1.396	1.41
Materials tannins and dyestuffs - Symbolism/inspiration	1.988	1.99	1.992
Materials tannins and dyestuffs - Smoking materials	-0.781	-0.779	-0.778
Materials tannins and dyestuffs - Invertebrate poisons	1.932	1.935	1.939
Materials tannins and dyestuffs - Vertebrate poisons	3.01	3.019	3.027
Materials tannins and dyestuffs - Soil improvers	5.056	5.064	5.072
Materials tannins and dyestuffs - Shelter/hedges	3.685	3.694	3.704
Materials tannins and dyestuffs - Ornamental	1.438	1.455	1.472
Materials wax - Materials wood	2.81	2.812	2.814
Materials wax - Medicines	-0.684	-0.683	-0.683
Materials wax - Symbolism/inspiration	-0.214	-0.213	-0.211
Materials wax - Smoking materials	2.009	2.012	2.015
Materials wax - Invertebrate poisons	1.834	1.837	1.84
Materials wax - Vertebrate poisons	1.818	1.821	1.823
Materials wax - Soil improvers	4.556	4.559	4.563
Materials wax - Shelter/hedges	3.44	3.443	3.445
Materials wax - Ornamental	3.248	3.25	3.252
Materials wood - Medicines	4.117	4.132	4.147
Materials wood - Symbolism/inspiration	2.959	2.961	2.963
Materials wood - Smoking materials	3.116	3.14	3.164
Materials wood - Invertebrate poisons	3.303	3.31	3.316
Materials wood - Vertebrate poisons	5.725	5.735	5.745
Materials wood - Soil improvers	0.738	0.744	0.75
Materials wood - Shelter/hedges	0.612	0.621	0.629
Materials wood - Ornamental	4.425	4.437	4.449
Medicines - Symbolism/inspiration	-	-	-
Medicines - Smoking materials	-0.423	-0.423	-0.422
Medicines - Invertebrate poisons	-	-	-
Medicines - Vertebrate poisons	0.978	0.996	1.014
Medicines - Soil improvers	-1.241	-1.229	-1.217
Medicines - Shelter/hedges	2.199	2.213	2.227
Medicines - Ornamental	0.437	0.449	0.461
Symbolism/inspiration - Smoking materials	1.722	1.724	1.727
Symbolism/inspiration - Invertebrate poisons	1.199	1.201	1.204
Symbolism/inspiration - Vertebrate poisons	1.884	1.889	1.893
Symbolism/inspiration - Soil improvers	3.027	3.032	3.036
Symbolism/inspiration - Shelter/hedges	1.883	1.885	1.886
Symbolism/inspiration - Ornamental	1.737	1.745	1.754
Smoking materials - Invertebrate poisons	0.952	0.955	0.957
Smoking materials - Vertebrate poisons	2.73	2.741	2.752
Smoking materials - Soil improvers	4.433	4.444	4.455
Smoking materials - Shelter/hedges	2.751	2.768	2.784
Smoking materials - Ornamental	-0.556	-0.525	-0.493
Invertebrate poisons - Vertebrate poisons	0.632	0.639	0.647
Invertebrate poisons - Soil improvers	3.64	3.649	3.657
Invertebrate poisons - Shelter/hedges	2.858	2.862	2.866
Invertebrate poisons - Ornamental	1.577	1.578	1.58
Vertebrate poisons - Soil improvers	1.903	1.91	1.916
Vertebrate poisons - Shelter/hedges	3.564	3.572	3.58
Vertebrate poisons - Ornamental	-1.186	-1.173	-1.161
Soil improvers - Shelter/hedges	3.462	3.468	3.474
Soil improvers - Ornamental	-0.867	-0.854	-0.841
Shelter/hedges - Ornamental	1.405	1.42	1.434

## Sheet: PD species full data
Category	Nº records	Lower bound (95% CI)	Mean SES PD	Upper bound (95% CI)
Human food	1334	-6.05336	-6.04086	-6.02836
Food additives	456	-4.08203	-4.07241	-4.06278
Vertebrate food	819	-25.1402	-25.1326	-25.1251
Invertebrate food	236	-7.22348	-7.2185	-7.21353
Charcoal	57	-3.44759	-3.44119	-3.43478
Fuelwood	143	-5.25716	-5.25013	-5.2431
Biofuels	35	-4.27195	-4.27102	-4.2701
Materials beads	106	-0.200714	-0.198352	-0.19599
Materials cane	150	-15.3943	-15.387	-15.3797
Materials scents/essential oils	298	-6.44441	-6.43705	-6.42968
Materials fibres	323	-8.40235	-8.39191	-8.38147
Materials gum/resin	178	-8.0213	-8.0103	-7.9993
Materials rubber	58	-9.49317	-9.49165	-9.49013
Materials lipids	153	-2.99276	-2.98613	-2.9795
Materials tannins and dyestuffs	172	-1.03719	-1.0306	-1.024
Materials wax	18	-0.444623	-0.44331	-0.441997
Materials wood	1207	-11.0974	-11.0738	-11.0502
Medicines	3060	3.46646	3.49576	3.52505
Symbolism/inspiration	54	-2.03947	-2.03411	-2.02875
Smoking materials	77	-3.61625	-3.61112	-3.60599
Invertebrate poisons	44	-1.50851	-1.50655	-1.5046
Vertebrate poisons	791	-4.98154	-4.97388	-4.96622
Soil improvers	684	-15.1676	-15.1523	-15.137
Shelter/hedges	337	-6.53147	-6.52218	-6.51289
Ornamental	5044	0.434342	0.464902	0.495462

## Sheet: PD species congeneric data
Category	Nº records	Lower bound (95% CI)	Mean SES PD	Upper bound (95% CI)
Human food	1146	-8.661	-8.647	-8.634
Food additives	372	-5.203	-5.193	-5.183
Vertebrate food	739	-26.02	-26.014	-26.008
Invertebrate food	209	-7.51	-7.504	-7.499
Charcoal	48	-3.979	-3.972	-3.965
Fuelwood	127	-5.485	-5.478	-5.471
Biofuels	29	-4.142	-4.141	-4.14
Materials beads	74	-0.737	-0.734	-0.731
Materials cane	134	-15.274	-15.267	-15.259
Materials scents/essential oils	250	-6.918	-6.909	-6.901
Materials fibres	272	-9.39	-9.379	-9.368
Materials gum/resin	167	-8.498	-8.487	-8.476
Materials rubber	48	-9.033	-9.031	-9.029
Materials lipids	126	-3.098	-3.091	-3.084
Materials tannins and dyestuffs	147	-2.018	-2.011	-2.004
Materials wax	14	-0.389	-0.388	-0.386
Materials wood	1047	-14.806	-14.782	-14.759
Medicines	2526	-4.283	-4.253	-4.224
Symbolism/inspiration	47	-1.706	-1.701	-1.695
Smoking materials	59	-3.921	-3.915	-3.909
Invertebrate poisons	33	-1.672	-1.67	-1.668
Vertebrate poisons	679	-7.017	-7.01	-7.002
Soil improvers	609	-16.2	-16.184	-16.169
Shelter/hedges	295	-7.532	-7.522	-7.513
Ornamental	4367	-7.681	-7.649	-7.617

## Sheet: PD genera full data
Category	Nº records	Lower bound (95% CI)	Mean SES PD	Upper bound (95% CI)
Human food	607	1.001	1.014	1.027
Food additives	286	0.99	0.994	0.997
Vertebrate food	304	-10.596	-10.586	-10.577
Invertebrate food	136	-3.091	-3.088	-3.086
Charcoal	37	-0.476	-0.475	-0.475
Fuelwood	74	-0.566	-0.559	-0.553
Biofuels	29	-2.651	-2.65	-2.65
Materials beads	94	0.948	0.955	0.962
Materials cane	44	-6.547	-6.546	-6.544
Materials scents/essential oils	174	-1.061	-1.048	-1.035
Materials fibres	178	-2.288	-2.279	-2.271
Materials gum/resin	74	-0.444	-0.438	-0.432
Materials rubber	33	-5.815	-5.806	-5.797
Materials lipids	106	0.427	0.441	0.455
Materials tannins and dyestuffs	112	2.531	2.538	2.544
Materials wax	17	0.058	0.058	0.059
Materials wood	428	0.038	0.052	0.066
Medicines	1381	5.991	6.009	6.027
Symbolism/inspiration	34	1.457	1.457	1.457
Smoking materials	55	-1.01	-1.009	-1.009
Invertebrate poisons	37	0.061	0.069	0.078
Vertebrate poisons	456	1.405	1.419	1.433
Soil improvers	309	-6.136	-6.126	-6.117
Shelter/hedges	186	-0.515	-0.511	-0.507
Ornamental	1736	4.575	4.596	4.617

## Sheet: PD genera congeneric data
Category	Nº records	Lower bound (95% CI)	Mean SES PD	Upper bound (95% CI)
Human food	419	2.126	2.135	2.143
Food additives	202	1.677	1.679	1.681
Vertebrate food	224	-9.226	-9.22	-9.214
Invertebrate food	109	-2.639	-2.638	-2.636
Charcoal	28	-0.451	-0.451	-0.45
Fuelwood	58	-0.237	-0.231	-0.224
Biofuels	23	-2.31	-2.31	-2.309
Materials beads	62	0.92	0.921	0.922
Materials cane	28	-5.437	-5.436	-5.434
Materials scents/essential oils	126	0.117	0.119	0.121
Materials fibres	127	-1.721	-1.712	-1.704
Materials gum/resin	63	-0.538	-0.531	-0.525
Materials rubber	23	-4.631	-4.623	-4.614
Materials lipids	79	1.31	1.311	1.311
Materials tannins and dyestuffs	87	2.215	2.221	2.226
Materials wax	13	0.207	0.207	0.207
Materials wood	268	0.041	0.049	0.057
Medicines	847	5.311	5.323	5.336
Symbolism/inspiration	27	2.322	2.322	2.322
Smoking materials	37	-0.497	-0.496	-0.496
Invertebrate poisons	26	0.278	0.278	0.278
Vertebrate poisons	344	1.435	1.443	1.452
Soil improvers	234	-5.344	-5.338	-5.333
Shelter/hedges	144	-0.613	-0.61	-0.606
Ornamental	1059	5.253	5.267	5.281

## Sheet: βbenefits among congenerics
Genus	Richness	ES βsim	ES βnes	ES βsor
Abies	23	-1	0.998	-1
Abrus	2	-0.68	0.921	-0.366
Abutilon	4	0.182	0.175	0.113
Acacia	41	-0.99	0.988	-0.928
Acaciella	2	-0.234	-0.237	-0.303
Acaena	3	-0.874	-0.583	-0.958
Acalypha	7	-0.894	0.862	-0.845
Acantholimon	2	-0.68	-0.237	-0.867
Acanthospermum	2	-0.68	-0.237	-0.867
Acanthus	3	-0.874	0.818	-0.889
Acer	33	-1	0.998	-1
Achillea	11	-0.986	0.984	-0.98
Achimenes	3	-0.874	-0.583	-0.958
Achnatherum	2	-0.68	0.707	-0.645
Achyranthes	2	-0.68	0.707	-0.645
Acokanthera	3	-0.746	0.444	-0.889
Aconitum	22	-0.99	0.628	-1
Acorus	2	-0.68	0.779	-0.566
Acroceras	3	-0.874	-0.583	-0.958
Actaea	11	-1	0.996	-1
Actinidia	5	-0.807	-0.078	-0.938
Actinodaphne	4	-0.669	0.372	-0.692
Adansonia	5	-0.983	0.98	-0.918
Adenium	2	-0.68	0.707	-0.645
Adenophora	4	-0.944	0.762	-0.978
Adonis	4	-0.888	0.83	-0.95
Aechmea	10	-1	0.996	-1
Aeonium	5	-0.983	-0.896	-0.997
Aerides	4	-0.944	-0.792	-0.989
Aerva	3	-0.472	-0.583	-0.688
Aeschynanthus	3	-0.874	-0.583	-0.958
Aeschynomene	5	-0.881	0.42	-0.966
Aesculus	6	-0.993	0.994	-0.97
Aframomum	3	-0.874	0.818	-0.889
Afrocarpus	3	-0.669	0.742	-0.688
Afzelia	6	-0.784	0.193	-0.943
Agapanthus	4	-0.944	-0.792	-0.989
Agastache	2	-0.348	0.559	-0.566
Agathis	6	-0.993	0.914	-1
Agathosma	3	-0.874	0.818	-0.889
Agave	15	-0.611	0.534	-0.593
Ageratina	2	-0.68	0.616	-0.728
Ageratum	2	0.393	-0.237	0.393
Aglaia	2	0.393	-0.237	0.393
Aglaonema	4	-0.944	-0.792	-0.989
Agonandra	2	-0.68	-0.237	-0.867
Agrimonia	4	-0.853	0.929	-0.425
Agropyron	7	-0.98	0.954	-0.986
Agrostis	9	-0.994	0.993	-0.987
Ailanthus	3	-0.546	0.137	-0.738
Aiphanes	2	-0.68	-0.237	-0.867
Aira	5	-0.951	0.919	-0.983
Ajuga	5	-0.807	0.5	-0.87
Akebia	2	-0.68	-0.237	-0.867
Alangium	3	-0.087	-0.583	-0.458
Albizia	13	-0.954	0.95	-0.892
Alchemilla	4	-0.669	0.372	-0.692
Alchornea	5	-0.983	0.935	-0.993
Alhagi	2	-0.68	-0.237	-0.867
Alibertia	6	0.19	-0.412	-0.162
Allamanda	3	-0.874	0.818	-0.889
Allanblackia	3	-0.874	0.373	-0.916
Allium	45	-0.8	0.186	-0.99
Allophylus	2	-0.68	0.616	-0.728
Alloteropsis	2	-0.68	0.707	-0.645
Alnus	13	-0.928	0.83	-0.958
Alocasia	8	-0.998	0.994	-0.998
Aloe	10	-0.998	0.994	-0.998
Alopecurus	3	-0.874	0.713	-0.914
Alphitonia	3	0.285	-0.142	-0.098
Alpinia	11	-0.946	0.728	-0.98
Alstonia	9	-0.985	0.984	-0.96
Alstroemeria	4	-0.944	-0.792	-0.989
Alternanthera	6	-0.681	0.585	-0.713
Alyogyne	3	-0.874	-0.583	-0.958
Alyssum	6	-0.993	-0.95	-1
Amaranthus	9	-0.996	0.994	-0.994
Amaryllis	2	-0.68	0.837	-0.488
Ambrosia	2	0.393	-0.237	0.393
Amelanchier	6	-0.903	0.893	-0.851
Ammi	2	-0.68	0.616	-0.728
Ammophila	2	-0.68	-0.237	-0.867
Amomum	9	-0.998	0.998	-0.996
Amorpha	3	-0.874	0.818	-0.889
Amorphophallus	4	-0.745	0.801	-0.609
Ampelopsis	2	0.393	-0.237	0.393
Amphilophium	2	-0.68	-0.237	-0.867
Amphimas	2	-0.68	-0.237	-0.867
Anabasis	2	-0.294	0.602	-0.303
Anacampseros	2	-0.68	-0.237	-0.867
Anacardium	3	-0.087	0.67	0.475
Anadenanthera	2	-0.68	-0.237	-0.867
Ananas	3	-0.489	0.303	-0.458
Anaphalis	3	0.372	-0.093	0.17
Anchusa	5	-0.983	0.98	-0.938
Andira	5	-0.983	0.997	-0.667
Andrographis	2	-0.68	-0.237	-0.867
Andropogon	8	-0.938	0.8	-0.971
Anemone	17	-0.998	0.918	-1
Anemopaegma	2	-0.68	-0.237	-0.867
Angelica	17	-1	0.998	-1
Anigozanthos	5	-0.983	-0.896	-0.997
Anisodontea	2	-0.68	-0.237	-0.867
Anisomeles	2	-0.68	0.921	-0.366
Anisoptera	2	-0.68	-0.237	-0.867
Annickia	3	-0.874	-0.583	-0.958
Annona	11	-1	0.998	-0.998
Anoectochilus	2	-0.68	-0.237	-0.867
Anogeissus	3	-0.546	0.713	-0.098
Anredera	2	-0.68	0.837	-0.488
Anthephora	2	0.393	-0.237	0.393
Anthoxanthum	2	-0.234	0.537	-0.265
Anthurium	2	-0.68	0.707	-0.645
Anthyllis	4	0.5	-0.416	0.49
Antidesma	3	-0.669	0.818	-0.458
Antigonon	2	-0.68	-0.237	-0.867
Antirrhinum	3	-0.874	-0.583	-0.958
Aphelandra	4	-0.944	-0.792	-0.989
Apios	2	-0.68	0.707	-0.645
Apocynum	3	-0.611	0.698	-0.634
Aponogeton	3	-0.874	0.818	-0.889
Aquilaria	3	-0.874	0.768	-0.914
Aquilegia	11	-1	0.998	-1
Arabis	5	-0.983	0.95	-0.992
Arachis	6	-0.537	0.682	-0.222
Arachnis	3	-0.874	-0.583	-0.958
Aralia	10	-0.992	0.96	-0.992
Araucaria	8	-0.996	0.992	-0.998
Araujia	2	0.393	-0.237	0.393
Arbutus	2	-0.68	0.921	-0.366
Arceuthobium	2	-0.68	-0.237	-0.867
Archidendron	2	0.393	-0.237	0.393
Archontophoenix	2	-0.68	-0.237	-0.867
Arctium	3	-0.874	0.876	-0.855
Arctostaphylos	2	-0.68	0.921	-0.366
Ardisia	6	-0.993	0.944	-0.999
Areca	6	-0.953	0.966	-0.547
Arenga	4	-0.669	0.608	-0.577
Argemone	2	0.393	-0.237	0.393
Ariocarpus	6	-0.993	-0.95	-1
Arisaema	8	-0.889	0.6	-0.971
Aristolochia	21	-0.924	-0.484	-1
Armeria	2	-0.68	-0.237	-0.867
Armoracia	2	-0.68	0.837	-0.488
Arnebia	5	-0.727	0.33	-0.799
Arnica	7	-1	0.996	-0.998
Aronia	3	-0.874	0.861	-0.864
Artemisia	36	-0.958	0.782	-0.998
Artocarpus	14	-0.995	0.948	-0.996
Arum	2	-0.68	0.837	-0.488
Arundinaria	4	-0.598	0.264	-0.636
Asarum	10	-1	0.996	-1
Asclepias	7	-0.966	0.692	-0.988
Asparagus	18	-0.381	-0.766	-0.964
Asphodeline	3	-0.874	-0.583	-0.958
Asphodelus	2	-0.68	0.707	-0.645
Aspidosperma	3	-0.874	0.916	-0.802
Aster	3	-0.874	0.818	-0.889
Astilbe	3	-0.087	-0.583	-0.458
Astragalus	18	-0.665	0.406	-0.824
Astrantia	2	-0.68	0.707	-0.645
Astrebla	4	-0.944	-0.792	-0.989
Astrocaryum	6	-0.95	0.896	-0.972
Astronium	4	-0.944	0.874	-0.966
Astrophytum	5	-0.983	-0.896	-0.997
Atalantia	2	0.393	-0.237	0.393
Atractylodes	2	-0.68	-0.237	-0.867
Atriplex	8	0.237	-0.27	0.078
Atropa	2	-0.68	0.707	-0.645
Attalea	6	-0.95	0.916	-0.965
Austrocylindropuntia	3	-0.874	0.818	-0.889
Avena	8	-0.874	0.776	-0.906
Averrhoa	2	-0.68	0.707	-0.645
Axonopus	4	-0.944	0.924	-0.95
Azorella	2	-0.68	0.707	-0.645
Baccaurea	5	-0.983	-0.896	-0.997
Baccharis	3	-0.874	0.818	-0.889
Backhousia	3	-0.087	0.137	-0.098
Bactris	2	0.393	-0.237	0.393
Balanophora	2	0.393	-0.237	0.393
Bambusa	21	-0.996	0.988	-0.992
Banksia	16	-1	0.998	-1
Baphia	2	-0.68	0.837	-0.488
Baptisia	2	-0.68	0.616	-0.728
Barbarea	2	-0.68	0.837	-0.488
Barleria	5	-0.534	0.47	-0.516
Barringtonia	4	0.5	-0.792	0.282
Bassia	3	0.372	0.346	0.422
Bauhinia	10	-0.682	-0.685	-0.981
Beaucarnea	2	-0.68	-0.237	-0.867
Beckmannia	2	-0.68	0.707	-0.645
Begonia	21	-1	-1	-1
Beilschmiedia	5	-0.983	-0.896	-0.997
Bejaria	3	-0.874	-0.583	-0.958
Bellucia	2	-0.68	0.837	-0.488
Berberis	16	-0.986	0.932	-0.992
Bergenia	4	-0.944	0.948	-0.927
Betula	14	-0.99	0.99	-0.972
Biancaea	2	-0.294	0.577	-0.366
Bidens	7	-0.864	0.538	-0.929
Billardiera	2	-0.68	-0.237	-0.867
Billbergia	6	-0.993	-0.95	-1
Bischofia	2	-0.294	0.577	-0.366
Bistorta	3	-0.669	0.742	-0.688
Blepharis	3	-0.087	-0.583	-0.458
Bletia	2	-0.68	-0.237	-0.867
Blumea	5	-0.951	0.96	-0.899
Bocconia	2	-0.68	0.616	-0.728
Boehmeria	7	-0.988	0.982	-0.988
Bolboschoenus	2	-0.68	0.707	-0.645
Borago	2	-0.68	0.978	-0.265
Borassus	2	-0.68	0.779	-0.566
Boschniakia	2	-0.68	-0.237	-0.867
Boscia	2	0.393	-0.237	0.393
Boswellia	5	-0.881	0.87	-0.752
Bothriochloa	7	-1	0.994	-1
Bouea	2	-0.68	0.707	-0.645
Bougainvillea	3	-0.874	0.713	-0.914
Bouteloua	6	-0.993	0.984	-0.997
Bowdichia	2	-0.68	-0.237	-0.867
Bowenia	2	-0.68	0.707	-0.645
Brachychiton	4	-0.944	0.874	-0.966
Brachyglottis	2	-0.68	0.707	-0.645
Brahea	4	-0.853	0.793	-0.927
Brassica	10	-0.994	0.974	-0.99
Breynia	6	-0.456	-0.272	-0.79
Bridelia	4	-0.944	0.948	-0.927
Briza	4	-0.783	0.417	-0.891
Bromus	18	-0.984	0.87	-0.998
Brosimum	4	-0.669	0.747	-0.385
Broussonetia	2	-0.68	0.837	-0.488
Browallia	3	-0.874	-0.583	-0.958
Brownea	3	-0.874	-0.583	-0.958
Brugmansia	7	-0.992	0.98	-0.997
Brunfelsia	5	-0.534	0.082	-0.714
Bryonia	2	-0.68	0.616	-0.728
Buddleja	22	-0.998	0.998	-0.994
Bulbophyllum	2	-0.68	-0.237	-0.867
Bulnesia	3	-0.669	0.742	-0.688
Bunchosia	3	-0.087	-0.583	-0.458
Bunium	2	-0.294	-0.237	-0.488
Bupleurum	7	-0.976	0.718	-0.99
Bursera	6	0.077	0.149	0.21
Butea	2	-0.68	0.921	-0.366
Butia	3	-0.669	0.579	-0.802
Buxus	5	-0.881	0.884	-0.714
Byrsonima	3	0.372	-0.093	0.17
Cadaba	2	0.393	-0.237	0.393
Caesalpinia	11	-0.519	0.444	-0.496
Caladium	3	-0.874	0.916	-0.802
Calamagrostis	5	-0.807	0.5	-0.87
Calamus	35	-1	0.986	-1
Calanthe	2	-0.68	-0.237	-0.867
Calceolaria	5	-0.983	-0.896	-0.997
Callaeum	3	0.372	-0.093	0.17
Callerya	4	-0.783	0.417	-0.891
Calliandra	6	-0.784	0.865	-0.428
Callicarpa	7	-0.881	0.037	-0.97
Callisia	4	-0.944	0.874	-0.966
Callitris	6	-0.957	0.922	-0.97
Calocedrus	3	-0.087	0.137	-0.098
Calophyllum	23	-1	0.998	-1
Calopogonium	2	-0.68	0.707	-0.645
Calotis	3	-0.874	-0.583	-0.958
Calotropis	2	-0.68	0.779	-0.566
Caltha	2	-0.68	0.707	-0.645
Calycanthus	2	-0.68	0.837	-0.488
Calycophyllum	2	-0.68	-0.237	-0.867
Camassia	2	-0.68	0.707	-0.645
Camellia	6	-0.681	0.612	-0.688
Campanula	29	-1	0.994	-1
Campnosperma	2	-0.68	-0.237	-0.867
Campomanesia	4	-0.944	0.874	-0.966
Campsis	2	-0.294	-0.237	-0.488
Canarium	16	-0.986	0.966	-0.978
Canavalia	5	-0.85	0.864	-0.684
Canna	7	-0.98	0.988	-0.9
Canscora	2	-0.68	-0.237	-0.867
Capparis	5	-0.951	0.976	-0.667
Capsicum	7	-0.994	0.994	-0.966
Caragana	7	-0.966	0.902	-0.956
Caralluma	3	-0.087	-0.583	-0.458
Carapa	3	-0.874	0.818	-0.889
Cardamine	2	0.393	-0.237	0.393
Cardiocrinum	2	-0.68	-0.237	-0.867
Cardiospermum	2	-0.68	0.616	-0.728
Carex	31	0.478	-0.998	-0.982
Carica	2	-0.68	0.837	-0.488
Cariniana	2	-0.68	0.707	-0.645
Carissa	4	-0.2	-0.2	-0.577
Carlina	2	0.393	-0.237	0.393
Carmichaelia	3	-0.874	-0.583	-0.958
Carpinus	5	-0.935	0.819	-0.983
Carpobrotus	3	-0.611	0.635	-0.747
Carya	11	-1	0.986	-0.998
Caryocar	5	-0.27	-0.246	-0.585
Caryota	2	-0.68	0.779	-0.566
Casearia	4	-0.372	0.092	-0.495
Casimiroa	3	-0.874	0.876	-0.855
Cassia	10	-0.998	0.998	-0.994
Cassiope	5	-0.983	-0.896	-0.997
Castanea	6	-0.806	0.42	-0.915
Castanopsis	5	-0.965	0.878	-0.992
Castilla	2	-0.68	-0.237	-0.867
Casuarina	4	-0.783	0.729	-0.692
Catalpa	6	-0.981	0.946	-0.997
Catasetum	2	-0.68	-0.237	-0.867
Catopsis	2	-0.68	-0.237	-0.867
Cattleya	9	-0.999	-0.991	-1
Caulophyllum	2	-0.68	0.616	-0.728
Cayaponia	2	-0.68	-0.237	-0.867
Ceanothus	10	-0.69	0.238	-0.9
Cecropia	3	-0.669	0.579	-0.802
Cedrela	3	-0.874	0.986	-0.458
Cedrus	3	-0.748	0.346	-0.914
Ceiba	4	-0.878	0.935	-0.636
Celastrus	4	-0.783	0.729	-0.692
Celmisia	2	-0.68	-0.237	-0.867
Celtis	9	-0.929	0.726	-0.968
Cenchrus	17	-1	0.998	-1
Cenostigma	2	-0.294	0.577	-0.366
Centaurea	10	-0.99	0.928	-0.99
Centrosema	9	-0.992	0.98	-0.994
Cephalaria	2	0.393	-0.237	0.393
Cerastium	2	-0.68	-0.237	-0.867
Ceratostigma	3	-0.874	0.818	-0.889
Ceratotheca	2	0.393	-0.237	0.393
Ceratozamia	2	-0.68	-0.237	-0.867
Cerbera	2	-0.294	0.577	-0.366
Cercidiphyllum	2	-0.68	-0.237	-0.867
Cercis	3	-0.874	0.818	-0.889
Cercocarpus	2	-0.68	0.707	-0.645
Cereus	5	0.311	-0.134	0.397
Cerinthe	3	-0.874	0.818	-0.889
Cestrum	7	-1	0.992	-1
Chaenomeles	3	-0.746	0.444	-0.889
Chaerophyllum	4	-0.031	-0.792	-0.636
Chamaecrista	5	0.311	-0.134	0.397
Chamaecyparis	6	-0.968	0.95	-0.978
Chamaedorea	8	-0.945	-0.966	-0.999
Chenopodium	6	-0.919	0.792	-0.953
Chimaphila	2	-0.68	0.837	-0.488
Chimarrhis	2	-0.68	-0.237	-0.867
Chimonobambusa	11	-0.98	0.888	-0.994
Chionanthus	2	-0.68	0.707	-0.645
Chloranthus	2	-0.68	0.59	-0.734
Chloris	7	-0.982	0.876	-0.992
Chlorophytum	2	0.393	-0.237	0.393
Chorizema	2	-0.68	-0.237	-0.867
Chrozophora	2	0.393	-0.237	0.393
Chrysanthemum	5	-0.935	0.819	-0.983
Chrysophyllum	4	-0.944	0.933	-0.949
Chrysopogon	4	-0.669	0.747	-0.385
Chusquea	2	-0.68	0.837	-0.488
Cichorium	2	-0.68	0.921	-0.366
Cicuta	2	-0.68	-0.237	-0.867
Cinchona	2	-0.68	0.616	-0.728
Cinnamomum	13	-0.84	0.682	-0.925
Cirsium	4	-0.372	0.092	-0.495
Cissus	6	-0.919	0.792	-0.953
Cistanche	2	-0.68	-0.237	-0.867
Cistus	12	-1	0.994	-0.981
Citharexylum	3	-0.874	-0.583	-0.958
Citrullus	2	-0.68	0.707	-0.645
Citrus	19	-1	0.998	-0.998
Clappertonia	2	-0.68	0.707	-0.645
Clarkia	3	-0.874	-0.583	-0.958
Clausena	4	-0.031	-0.304	-0.425
Claytonia	2	0.393	-0.237	0.393
Cleistocactus	3	-0.874	-0.583	-0.958
Clematis	32	-0.998	0.22	-1
Cleome	5	0.229	0.001	0.442
Clerodendrum	15	-0.979	0.756	-1
Clethra	4	-0.944	-0.792	-0.989
Clinopodium	5	-0.75	0.722	-0.642
Clitoria	3	-0.472	-0.034	-0.458
Clivia	2	-0.68	-0.237	-0.867
Clusia	3	-0.874	-0.583	-0.958
Cnestis	2	-0.68	0.707	-0.645
Cnidoscolus	2	0.393	-0.237	0.393
Coccoloba	3	-0.874	0.961	-0.688
Coccothrinax	2	-0.68	0.707	-0.645
Cocculus	3	-0.087	0.137	-0.098
Cochlospermum	2	-0.348	-0.237	-0.645
Codonopsis	5	-0.983	0.982	-0.914
Coelia	2	-0.68	-0.237	-0.867
Coelogyne	10	-1	-0.989	-1
Coffea	5	-0.983	0.98	-0.938
Coix	3	-0.669	0.886	-0.098
Cola	4	-0.888	0.924	-0.873
Colchicum	4	-0.826	0.778	-0.862
Coleostephus	2	-0.68	-0.237	-0.867
Colubrina	2	0.393	-0.237	0.393
Columnea	7	-1	-0.962	-1
Colutea	3	-0.669	0.579	-0.802
Comarostaphylis	2	-0.68	-0.237	-0.867
Combretum	9	-0.327	-0.41	-0.817
Commelina	7	-0.881	0.037	-0.97
Commiphora	12	-0.988	0.988	-0.962
Conophytum	51	-1	-1	-1
Conospermum	2	-0.68	-0.237	-0.867
Convolvulus	4	-0.372	0.092	-0.495
Copaifera	6	-0.993	0.976	-0.998
Copernicia	2	0.393	-0.237	0.393
Coprosma	3	-0.874	0.818	-0.889
Coptis	7	-1	-0.962	-1
Corchorus	3	-0.669	0.742	-0.688
Cordia	17	-0.736	0.262	-0.95
Cordyline	3	-0.669	0.579	-0.802
Coreopsis	6	-0.993	0.944	-0.999
Coriaria	3	-0.611	-0.583	-0.855
Cornus	21	-0.776	0.374	-0.958
Corokia	3	-0.874	-0.583	-0.958
Coronilla	3	-0.874	0.961	-0.688
Correa	4	-0.944	-0.792	-0.989
Cortaderia	2	-0.68	0.616	-0.728
Corydalis	10	-0.994	0.732	-0.998
Corylopsis	4	-0.944	-0.792	-0.989
Corylus	8	-0.99	0.992	-0.903
Corymbia	6	-0.061	0.304	0.174
Corynanthe	3	-0.669	0.818	-0.458
Corypha	2	-0.68	0.707	-0.645
Coryphantha	2	-0.68	-0.237	-0.867
Cosmos	5	-0.727	0.727	-0.516
Costus	2	-0.68	0.837	-0.488
Cotinus	2	-0.68	0.837	-0.488
Cotoneaster	15	-1	-1	-1
Cotyledon	2	-0.68	0.707	-0.645
Cotylelobium	3	-0.874	-0.583	-0.958
Couepia	6	-0.993	0.944	-0.999
Couma	3	-0.874	0.818	-0.889
Crambe	4	-0.598	0.357	-0.609
Crassula	8	-0.999	-0.966	-1
Crataegus	16	-0.939	0.784	-0.972
Crateva	2	-0.68	0.707	-0.645
Cratoxylum	3	-0.669	0.742	-0.688
Crepis	4	0.5	-0.047	0.741
Crescentia	2	-0.68	0.616	-0.728
Crinodendron	2	-0.68	-0.237	-0.867
Crinum	8	-0.98	0.849	-0.997
Crocosmia	4	-0.944	-0.792	-0.989
Crocus	7	-0.906	0.771	-0.929
Crotalaria	18	-0.976	0.954	-0.968
Croton	14	-0.93	0.89	-0.87
Cryptanthus	3	-0.874	-0.583	-0.958
Cryptocarya	7	-0.618	-0.325	-0.902
Cryptocoryne	6	-0.993	-0.95	-1
Cryptolepis	3	-0.669	0.579	-0.802
Cryptotaenia	2	-0.68	0.837	-0.488
Cucumis	9	-0.647	0.492	-0.707
Cucurbita	6	-0.947	0.896	-0.97
Cuphea	10	-0.885	0.583	-0.96
Cupressus	7	-0.872	0.346	-0.956
Curcuma	14	-0.836	0.566	-0.918
Curio	2	-0.68	-0.237	-0.867
Cuscuta	9	-0.985	0.84	-0.994
Cussonia	2	-0.68	-0.237	-0.867
Cyanthillium	2	-0.68	-0.237	-0.867
Cyathula	2	-0.68	-0.237	-0.867
Cycas	5	-0.983	0.972	-0.983
Cyclamen	6	-0.784	-0.95	-0.993
Cyclanthera	2	-0.68	0.707	-0.645
Cyclopia	4	-0.372	-0.792	-0.789
Cylindropuntia	2	-0.68	0.707	-0.645
Cymbalaria	2	-0.68	-0.237	-0.867
Cymbidium	3	-0.087	0.137	-0.098
Cymbopogon	9	-0.99	0.98	-0.984
Cynanchum	9	-0.999	0.994	-1
Cynodon	6	-0.954	0.916	-0.97
Cynoglossum	6	-0.784	0.193	-0.943
Cynometra	2	0.393	-0.237	0.393
Cyperus	26	-0.938	0.92	-0.902
Cypripedium	3	-0.874	-0.583	-0.958
Cyrtosperma	2	0.393	-0.237	0.393
Cytisus	8	-0.998	0.996	-0.985
Dacrycarpus	2	-0.68	0.707	-0.645
Dactyloctenium	2	-0.68	0.837	-0.488
Dactylorhiza	3	-0.087	-0.583	-0.458
Dahlia	3	-0.087	-0.583	-0.458
Dalbergia	21	-0.827	0.726	-0.88
Dalea	3	-0.087	0.137	-0.098
Daniellia	3	-0.874	0.713	-0.914
Danthonia	4	-0.783	0.417	-0.891
Daphne	19	-1	0.998	-1
Daphniphyllum	2	-0.68	-0.237	-0.867
Datura	4	-0.816	0.664	-0.866
Debregeasia	2	-0.68	-0.237	-0.867
Delosperma	3	-0.874	-0.583	-0.958
Delphinium	12	-1	0.996	-0.998
Dendrobium	16	-0.936	-0.42	-1
Dendrocalamus	7	-1	0.99	-0.999
Derris	6	0.47	-0.42	0.345
Desmanthus	2	0.393	-0.237	0.393
Desmodium	18	-0.822	0.632	-0.925
Detarium	2	0.393	-0.237	0.393
Deutzia	5	-0.983	-0.896	-0.997
Dialium	4	-0.878	0.756	-0.951
Dianella	2	-0.68	-0.237	-0.867
Dianthus	10	-1	0.998	-0.999
Dicentra	5	-0.85	-0.896	-0.992
Dichanthium	5	-0.983	0.935	-0.993
Dicorynia	2	-0.68	-0.237	-0.867
Dierama	2	-0.68	-0.237	-0.867
Dietes	3	-0.874	-0.583	-0.958
Digitalis	5	-0.983	0.952	-0.992
Digitaria	11	-0.946	0.768	-0.971
Dillenia	3	-0.087	0.444	0.17
Dimorphotheca	3	-0.874	0.818	-0.889
Dioon	3	-0.874	-0.583	-0.958
Dioscorea	24	-0.98	0.852	-0.998
Diospyros	26	-1	0.998	-1
Diplospora	2	-0.68	-0.237	-0.867
Dipsacus	5	-0.881	0.806	-0.87
Dipterocarpus	18	-1	0.998	-1
Dipteryx	2	-0.68	0.959	-0.303
Disocactus	4	-0.944	-0.792	-0.989
Dombeya	3	-0.874	-0.583	-0.958
Doronicum	3	-0.874	-0.583	-0.958
Dorstenia	2	-0.68	0.837	-0.488
Dovyalis	3	-0.874	0.818	-0.889
Draba	9	-0.999	-0.991	-1
Dracaena	15	-0.944	0.53	-0.994
Dracontium	2	0.393	-0.237	0.393
Dracula	4	-0.944	-0.792	-0.989
Drepanostachyum	3	-0.611	-0.583	-0.855
Drimia	2	-0.68	0.837	-0.488
Drosanthemum	3	-0.874	-0.583	-0.958
Drosera	6	-0.957	0.804	-0.996
Dryas	2	-0.68	0.707	-0.645
Dryobalanops	3	-0.669	0.742	-0.688
Drypetes	2	-0.68	0.837	-0.488
Duboisia	3	-0.874	-0.583	-0.958
Duguetia	3	-0.669	0.579	-0.802
Durio	3	-0.874	0.818	-0.889
Dyckia	2	-0.68	-0.237	-0.867
Dyera	2	-0.68	-0.237	-0.867
Dypsis	3	-0.874	-0.583	-0.958
Dysosma	4	-0.783	0.417	-0.891
Dysoxylum	2	-0.68	-0.237	-0.867
Dysphania	2	0.393	-0.237	0.393
Echeveria	7	-1	0.987	-1
Echinacea	4	-0.944	0.908	-0.952
Echinocereus	14	-1	0.998	-1
Echinochloa	6	-0.993	0.992	-0.978
Echinodorus	9	-0.999	0.994	-1
Echinops	5	-0.643	-0.896	-0.938
Echinopsis	4	-0.031	0.337	0.023
Echium	7	-0.999	0.996	-0.961
Ehretia	3	-0.874	0.876	-0.855
Ehrharta	3	-0.546	0.321	-0.688
Elaeagnus	8	-0.96	0.978	-0.598
Elaeis	2	-0.68	0.988	-0.239
Elaeocarpus	5	-0.807	0.888	-0.427
Eleocharis	4	-0.372	-0.792	-0.789
Elephantopus	2	-0.68	-0.237	-0.867
Elettaria	2	-0.68	0.594	-0.734
Eleutherococcus	7	-0.998	0.994	-0.99
Elsholtzia	4	-0.783	0.417	-0.891
Elymus	19	-1	0.998	-1
Embelia	4	-0.944	0.874	-0.966
Emilia	2	-0.68	0.707	-0.645
Encephalartos	10	-1	-0.989	-1
Endospermum	4	-0.944	0.933	-0.949
Enicostema	2	-0.68	-0.237	-0.867
Enkianthus	5	-0.983	-0.896	-0.997
Enneapogon	3	-0.874	-0.583	-0.958
Ensete	3	-0.546	0.579	-0.458
Entada	3	-0.733	0.713	-0.802
Entandrophragma	5	-0.983	-0.896	-0.997
Eperua	2	-0.68	-0.237	-0.867
Ephedra	14	-1	0.998	-1
Epidendrum	4	-0.944	-0.792	-0.989
Epilobium	3	-0.874	-0.583	-0.958
Epimedium	19	-0.998	0.922	-1
Epiphyllum	2	-0.68	0.707	-0.645
Epipremnum	4	-0.944	0.874	-0.966
Episcia	3	-0.874	-0.583	-0.958
Eragrostis	21	-1	0.998	-1
Eranthemum	2	0.393	-0.237	0.393
Erica	20	-1	0.99	-1
Erigeron	6	-0.784	-0.95	-0.993
Eriochloa	5	-0.643	-0.896	-0.938
Eriodictyon	3	-0.874	0.818	-0.889
Eriogonum	4	-0.372	0.496	-0.23
Erisma	2	0.393	-0.237	0.393
Erodium	5	-0.643	0.619	-0.585
Eryngium	9	-0.93	0.798	-0.965
Erysimum	4	-0.944	0.874	-0.966
Erythrina	19	-0.986	0.968	-0.984
Erythronium	8	-0.945	0.342	-0.998
Erythrophleum	2	-0.68	0.616	-0.728
Erythroxylum	3	-0.546	0.579	-0.458
Escallonia	3	-0.874	-0.583	-0.958
Espostoa	2	-0.68	-0.237	-0.867
Eucalyptus	81	-1	0.998	-1
Eucharis	3	-0.874	-0.583	-0.958
Eucryphia	2	-0.68	0.616	-0.728
Eugenia	7	-1	0.996	-0.998
Euonymus	6	-0.91	0.855	-0.895
Eupatorium	4	-0.598	-0.792	-0.873
Euphorbia	59	-0.994	0.934	-1
Eurya	2	-0.68	-0.237	-0.867
Eustachys	2	-0.68	0.707	-0.645
Euterpe	3	-0.669	0.742	-0.688
Evolvulus	3	-0.087	-0.583	-0.458
Excoecaria	3	0.76	-0.583	0.76
Fagopyrum	2	-0.68	0.837	-0.488
Fagraea	4	-0.853	0.918	-0.636
Fagus	8	-0.999	0.996	-0.985
Fallopia	3	-0.087	-0.583	-0.458
Fargesia	8	-0.273	0.048	-0.5
Felicia	2	-0.68	-0.237	-0.867
Ferocactus	11	-0.946	-0.994	-0.998
Ferula	25	-0.814	0.434	-0.97
Festuca	16	-0.996	0.982	-0.994
Ficus	48	-0.359	0.44	-0.026
Filipendula	3	-0.874	0.916	-0.802
Fimbristylis	2	0.393	-0.237	0.393
Flacourtia	4	-0.944	0.908	-0.952
Flemingia	2	0.393	-0.237	0.393
Flindersia	8	-0.999	-0.966	-1
Flueggea	3	-0.087	-0.583	-0.458
Forestiera	3	-0.874	0.818	-0.889
Forsythia	4	-0.944	0.874	-0.966
Fothergilla	2	-0.68	-0.237	-0.867
Fragaria	4	-0.944	0.874	-0.966
Frangula	3	-0.669	0.579	-0.802
Fraxinus	15	-0.982	0.962	-0.99
Freesia	3	-0.874	-0.583	-0.958
Fritillaria	14	-0.798	-0.13	-0.98
Fuchsia	8	-0.999	0.992	-1
Fumaria	2	-0.68	-0.237	-0.867
Funtumia	2	-0.68	0.616	-0.728
Furcraea	6	-0.815	0.042	-0.968
Gaillardia	3	-0.874	-0.583	-0.958
Galanthus	8	-0.999	0.996	-0.998
Galega	2	-0.68	0.959	-0.303
Galium	5	-0.856	0.786	-0.855
Garcinia	19	-0.938	0.89	-0.97
Gardenia	4	-0.783	0.417	-0.891
Garrya	2	0.393	-0.237	0.393
Gaultheria	4	0.182	0.175	0.113
Gaylussacia	5	-0.807	0.259	-0.899
Gazania	2	-0.68	-0.237	-0.867
Genista	6	-0.784	0.8	-0.639
Gentiana	14	-0.988	0.854	-0.996
Geranium	10	-0.993	0.908	-0.998
Geum	4	-0.853	0.793	-0.927
Gibbaeum	7	-1	-0.962	-1
Gigantochloa	11	-0.885	0.461	-0.978
Gilia	2	-0.68	-0.237	-0.867
Gladiolus	8	-0.945	-0.966	-0.999
Glandularia	3	-0.874	-0.583	-0.958
Glaucium	2	-0.68	0.837	-0.488
Glebionis	2	-0.68	-0.237	-0.867
Glechoma	2	-0.68	0.707	-0.645
Gleditsia	4	0.182	0.528	0.49
Globularia	2	-0.68	-0.237	-0.867
Glottiphyllum	4	-0.944	-0.792	-0.989
Gluta	3	-0.669	0.579	-0.802
Glyceria	2	0.393	-0.237	0.393
Glycine	3	-0.874	0.997	-0.098
Glycyrrhiza	5	-0.451	0.56	-0.351
Gmelina	3	-0.546	0.713	-0.098
Gnetum	4	-0.944	0.874	-0.966
Gomphocarpus	2	-0.68	0.616	-0.728
Gonystylus	4	-0.944	-0.792	-0.989
Gordonia	2	-0.68	-0.237	-0.867
Gossypium	5	-0.94	0.908	-0.958
Graptopetalum	3	-0.874	-0.583	-0.958
Grevillea	6	-0.919	0.903	-0.872
Grewia	5	-0.27	-0.246	-0.585
Grindelia	3	0.505	-0.583	0.333
Griselinia	2	-0.68	-0.237	-0.867
Guaiacum	2	-0.68	-0.237	-0.867
Guarea	3	-0.874	0.916	-0.802
Guarianthe	3	-0.874	-0.583	-0.958
Guibourtia	6	-0.993	0.96	-0.998
Guizotia	2	-0.68	0.959	-0.303
Guzmania	3	-0.874	-0.583	-0.958
Gynura	4	0.5	-0.792	0.282
Gypsophila	5	-0.935	0.819	-0.983
Haematoxylum	2	-0.68	0.921	-0.366
Hakea	3	-0.733	0.713	-0.802
Haloxylon	2	-0.68	0.707	-0.645
Hamamelis	2	-0.68	0.837	-0.488
Handroanthus	6	-0.934	0.87	-0.96
Harpullia	3	-0.874	0.818	-0.889
Harrisia	3	-0.874	0.818	-0.889
Hatiora	2	-0.68	-0.237	-0.867
Haworthia	2	-0.68	-0.237	-0.867
Hedera	6	-0.993	0.984	-0.997
Hedychium	6	-0.993	0.984	-0.997
Hedysarum	12	-0.948	0.906	-0.919
Helianthus	11	-0.986	0.992	-0.728
Helichrysum	5	-0.643	0.619	-0.585
Helicia	3	-0.874	-0.583	-0.958
Heliconia	12	-1	0.998	-1
Helicteres	2	-0.68	-0.237	-0.867
Heliotropium	7	-0.934	0.674	-0.961
Helleborus	3	-0.874	0.579	-0.916
Hemarthria	2	-0.68	-0.237	-0.867
Hemerocallis	6	-0.748	0.564	-0.831
Heracleum	7	-0.562	0.501	-0.503
Heritiera	5	-0.983	0.972	-0.983
Hesperaloe	2	0.393	-0.237	0.393
Heterocentron	2	-0.68	-0.237	-0.867
Heteropsis	2	-0.68	-0.237	-0.867
Heterotheca	2	-0.68	-0.237	-0.867
Heuchera	2	-0.68	0.707	-0.645
Hibiscus	25	-0.92	0.904	-0.816
Hilaria	4	-0.669	0.199	-0.789
Himalayacalamus	4	-0.031	-0.352	-0.442
Hippeastrum	4	-0.944	-0.792	-0.989
Hippocrepis	3	-0.087	-0.583	-0.458
Hippophae	2	-0.68	0.959	-0.303
Hoheria	3	-0.874	-0.583	-0.958
Holarrhena	2	-0.294	-0.237	-0.488
Holcus	2	0.393	-0.237	0.393
Hopea	2	-0.68	0.837	-0.488
Hordeum	3	-0.669	0.886	-0.098
Hosta	6	-0.993	0.944	-0.999
Hovenia	2	-0.294	0.602	-0.303
Howea	2	-0.68	-0.237	-0.867
Hoya	3	-0.669	0.579	-0.802
Humulus	2	-0.348	-0.237	-0.645
Hydnocarpus	3	-0.874	0.818	-0.889
Hydrangea	9	-0.994	0.984	-0.994
Hydrocotyle	5	-0.451	0.274	-0.585
Hylocereus	5	-0.935	0.819	-0.983
Hymenaea	2	-0.68	0.988	-0.239
Hymenocallis	3	-0.874	-0.583	-0.958
Hyophorbe	2	-0.68	-0.237	-0.867
Hyoscyamus	3	-0.669	0.579	-0.802
Hyparrhenia	4	-0.031	0.001	-0.23
Hypericum	10	-0.462	0.134	-0.734
Hyphaene	3	-0.874	0.986	-0.458
Hyptis	2	-0.68	-0.237	-0.867
Iberis	4	-0.944	0.874	-0.966
Ilex	24	-0.998	0.996	-0.984
Illicium	3	-0.472	0.364	-0.259
Impatiens	8	-0.889	-0.076	-0.99
Imperata	2	-0.68	0.921	-0.366
Incarvillea	2	0.393	-0.237	0.393
Indigofera	15	-0.932	0.852	-0.946
Inga	11	-0.645	0.442	-0.727
Intsia	2	-0.68	0.707	-0.645
Inula	5	-0.983	0.972	-0.983
Ipomoea	29	-0.845	0.502	-0.978
Ipomopsis	2	-0.68	-0.237	-0.867
Iresine	2	0.393	-0.237	0.393
Iris	18	-1	0.998	-1
Irvingia	3	-0.874	0.76	-0.914
Ischaemum	4	-0.944	0.933	-0.949
Iseilema	2	-0.68	-0.237	-0.867
Ismene	4	-0.944	-0.792	-0.989
Ixia	2	-0.68	-0.237	-0.867
Ixora	3	-0.874	-0.583	-0.958
Jacaranda	2	0.393	-0.237	0.393
Jacobaea	2	-0.68	0.616	-0.728
Jasminum	14	-0.997	0.99	-0.98
Jatropha	7	-0.98	0.968	-0.9
Juglans	13	-0.998	0.994	-0.988
Juncus	5	0.709	-0.349	0.703
Juniperus	25	-0.988	0.98	-0.96
Justicia	13	-0.938	0.886	-0.94
Kadsura	3	-0.874	-0.583	-0.958
Kaempferia	5	-0.807	0.762	-0.714
Kalanchoe	19	-1	0.998	-1
Kalmia	3	-0.874	0.818	-0.889
Kennedia	3	-0.874	-0.583	-0.958
Khaya	5	-0.983	0.935	-0.993
Koelreuteria	2	-0.68	-0.237	-0.867
Kohleria	3	-0.874	-0.583	-0.958
Koompassia	2	-0.68	0.707	-0.645
Krameria	4	-0.944	-0.792	-0.989
Kummerowia	2	-0.68	0.594	-0.734
Laburnum	2	-0.68	0.837	-0.488
Lachenalia	30	-1	-1	-1
Lactuca	6	-0.346	0.312	-0.404
Laelia	2	-0.68	-0.237	-0.867
Lagerstroemia	3	-0.669	0.579	-0.802
Lamium	3	-0.874	0.916	-0.802
Lampranthus	8	-0.999	-0.966	-1
Landolphia	5	-0.983	0.972	-0.983
Lantana	2	-0.294	-0.237	-0.488
Larix	9	-0.98	0.818	-0.994
Larrea	2	-0.68	0.837	-0.488
Latania	3	-0.874	-0.583	-0.958
Lathyrus	13	-0.683	0.002	-0.961
Launaea	2	-0.68	-0.237	-0.867
Lavandula	6	-0.976	0.96	-0.978
Lecythis	3	-0.874	0.876	-0.855
Leea	3	-0.087	-0.583	-0.458
Legousia	2	-0.68	-0.237	-0.867
Lemna	3	-0.472	-0.583	-0.688
Leonotis	2	-0.68	0.707	-0.645
Leontopodium	2	-0.68	-0.237	-0.867
Leonurus	4	-0.944	0.874	-0.966
Lepidium	6	-0.926	0.802	-0.97
Lepidozamia	2	-0.68	-0.237	-0.867
Lepismium	2	-0.68	-0.237	-0.867
Leptinella	3	-0.874	-0.583	-0.958
Leptolobium	2	-0.68	-0.237	-0.867
Leptospermum	6	-0.061	0.066	-0.093
Lespedeza	10	-0.996	0.986	-0.978
Leucadendron	4	-0.944	0.874	-0.966
Leucaena	4	0.5	0.195	0.849
Leucanthemum	3	-0.874	0.818	-0.889
Leucas	4	-0.944	0.874	-0.966
Leucojum	2	-0.68	-0.237	-0.867
Leucospermum	5	-0.983	-0.896	-0.997
Lewisia	3	-0.874	-0.583	-0.958
Leymus	14	-1	0.998	-1
Liatris	6	-0.981	0.946	-0.997
Libidibia	2	0.393	-0.237	0.393
Licania	4	0.269	-0.345	0.023
Licuala	3	-0.087	-0.583	-0.458
Ligularia	2	0.393	-0.237	0.393
Ligusticum	5	-0.935	0.819	-0.983
Ligustrum	10	-0.998	0.996	-0.998
Lilium	20	-1	0.998	-1
Limnanthes	2	-0.68	0.837	-0.488
Limnophila	3	-0.087	-0.583	-0.458
Limonium	8	0.214	-0.966	-0.725
Linaria	7	-0.906	-0.962	-0.994
Lindera	8	-0.645	0.366	-0.79
Linum	9	-0.732	0.852	-0.161
Liparis	2	-0.68	-0.237	-0.867
Lippia	6	-0.748	0.181	-0.915
Liquidambar	4	-0.834	0.893	-0.66
Liriope	3	-0.669	0.579	-0.802
Lithocarpus	2	-0.68	-0.237	-0.867
Lithops	28	-1	-1	-1
Lithospermum	4	-0.372	0.092	-0.495
Litsea	10	-0.898	0.742	-0.924
Livistona	3	-0.874	0.818	-0.889
Lobelia	9	-0.98	0.938	-0.986
Lolium	4	-0.826	0.806	-0.856
Lomelosia	2	-0.68	-0.237	-0.867
Lonicera	11	-0.761	0.184	-0.924
Lophira	2	-0.68	0.988	-0.239
Lophophora	2	0.393	-0.237	0.393
Lophostemon	2	-0.68	0.707	-0.645
Lotus	5	-0.27	0.47	-0.062
Lovoa	2	-0.68	-0.237	-0.867
Loxopterygium	2	-0.68	0.707	-0.645
Luculia	2	-0.68	-0.237	-0.867
Ludwigia	2	-0.68	-0.237	-0.867
Luffa	3	-0.669	0.303	-0.846
Luma	2	-0.68	0.707	-0.645
Lunaria	2	-0.68	-0.237	-0.867
Lupinus	15	-0.994	0.988	-0.981
Lycianthes	2	0.393	-0.237	0.393
Lycium	4	-0.525	0.286	-0.442
Lycopus	4	-0.944	-0.792	-0.989
Lycoris	5	-0.983	0.935	-0.993
Lyonia	3	-0.874	-0.583	-0.958
Lysimachia	5	-0.727	0.33	-0.799
Lythrum	2	-0.68	0.707	-0.645
Maackia	2	-0.68	0.837	-0.488
Macadamia	3	-0.087	-0.583	-0.458
Macaranga	3	-0.087	-0.583	-0.458
Macleaya	2	-0.68	-0.237	-0.867
Maclura	2	-0.294	0.602	-0.303
Macroptilium	4	-0.669	0.372	-0.692
Macrotyloma	3	-0.669	0.818	-0.458
Macrozamia	7	-1	0.987	-1
Madhuca	8	-0.968	0.945	-0.953
Magnolia	41	-0.996	0.986	-1
Malaxis	2	0.393	-0.237	0.393
Mallotus	2	-0.68	0.837	-0.488
Malpighia	4	-0.669	-0.03	-0.862
Malus	17	-1	0.984	-1
Malva	11	-0.992	0.988	-0.992
Mammea	2	0.393	-0.237	0.393
Mammillaria	18	-1	-1	-1
Mandevilla	5	-0.881	0.42	-0.966
Mandragora	2	-0.68	0.707	-0.645
Mangifera	6	-0.919	0.903	-0.872
Manihot	12	0.273	0.078	0.548
Manilkara	6	-0.748	0.722	-0.713
Maranta	4	-0.944	0.971	-0.789
Marrubium	2	-0.68	0.707	-0.645
Marsdenia	6	0.722	-0.95	0.402
Masdevallia	13	-1	-0.998	-1
Matricaria	2	-0.68	0.959	-0.303
Matthiola	2	-0.68	-0.237	-0.867
Matucana	4	-0.944	-0.792	-0.989
Maurandya	3	-0.874	-0.583	-0.958
Maxillaria	6	-0.993	-0.95	-1
Maytenus	3	-0.874	-0.583	-0.958
Meconopsis	6	-0.993	-0.95	-1
Medicago	17	-1	0.998	-1
Melaleuca	22	-0.992	0.99	-0.96
Melianthus	2	-0.68	-0.237	-0.867
Melica	5	-0.643	-0.896	-0.938
Melicoccus	3	-0.874	0.818	-0.889
Melilotus	4	-0.838	0.23	-0.952
Melinis	2	-0.294	-0.237	-0.488
Meliosma	3	-0.874	-0.583	-0.958
Mentha	13	-0.954	0.868	-0.967
Mentzelia	3	-0.087	-0.583	-0.458
Merremia	4	-0.372	0.092	-0.495
Mertensia	3	-0.874	0.818	-0.889
Mesembryanthemum	5	-0.151	0.03	-0.257
Metapanax	2	-0.68	0.707	-0.645
Metrosideros	5	-0.983	0.935	-0.993
Metroxylon	2	-0.68	0.707	-0.645
Miconia	3	-0.669	0.579	-0.802
Microberlinia	2	-0.68	-0.237	-0.867
Mikania	5	-0.643	0.131	-0.799
Milicia	2	-0.68	-0.237	-0.867
Millettia	7	-0.533	0.717	-0.042
Mimosa	7	-0.784	0.73	-0.747
Mirabilis	4	-0.372	0.496	-0.23
Miscanthus	5	-0.983	0.987	-0.899
Mitragyna	3	-0.087	0.137	-0.098
Molineria	2	0.393	-0.237	0.393
Mollugo	3	-0.874	-0.583	-0.958
Momordica	4	-0.868	0.808	-0.944
Monarda	6	-0.926	0.802	-0.97
Mondia	2	-0.68	0.707	-0.645
Monochoria	2	-0.68	-0.237	-0.867
Monodora	4	-0.888	0.912	-0.866
Monstera	2	-0.68	0.837	-0.488
Montanoa	6	0.077	-0.95	-0.688
Mora	2	-0.68	-0.237	-0.867
Moraea	5	-0.983	0.95	-0.992
Morella	5	0.658	-0.528	0.502
Morinda	2	-0.294	0.577	-0.366
Moringa	3	-0.669	0.703	-0.747
Mormodes	2	-0.68	-0.237	-0.867
Morus	7	-0.474	0.346	-0.592
Mucuna	3	-0.874	0.997	-0.098
Muhlenbergia	13	0.186	-0.762	-0.644
Musa	14	-0.382	0.106	-0.693
Muscari	5	-0.983	0.935	-0.993
Mussaenda	2	-0.68	-0.237	-0.867
Myoporum	2	0.393	-0.237	0.393
Myosotis	4	-0.372	-0.792	-0.789
Myrciaria	2	-0.294	-0.237	-0.488
Myriophyllum	3	-0.874	-0.583	-0.958
Myrocarpus	2	0.393	-0.237	0.393
Myrsine	2	0.393	-0.237	0.393
Nageia	2	0.393	-0.237	0.393
Narcissus	11	-1	0.998	-0.998
Nassella	3	-0.874	0.713	-0.914
Nasturtium	3	-0.087	0.137	-0.098
Nauclea	2	0.393	-0.237	0.393
Nautilocalyx	3	-0.874	-0.583	-0.958
Neillia	2	-0.68	-0.237	-0.867
Nelumbo	2	-0.68	0.978	-0.265
Nemesia	2	-0.68	-0.237	-0.867
Nemophila	2	-0.68	-0.237	-0.867
Neolitsea	2	-0.294	-0.237	-0.488
Neoregelia	5	-0.983	-0.896	-0.997
Nepeta	3	-0.669	0.742	-0.688
Nephelium	2	-0.68	-0.237	-0.867
Neptunia	2	-0.68	0.707	-0.645
Nerine	2	-0.68	-0.237	-0.867
Nicotiana	11	-0.777	0.534	-0.85
Nidularium	4	-0.944	-0.792	-0.989
Nierembergia	3	-0.874	0.818	-0.889
Nigella	3	-0.546	0.579	-0.458
Nothofagus	8	-0.99	0.906	-0.998
Nothoscordum	2	-0.68	0.707	-0.645
Nuphar	2	0.393	-0.237	0.393
Nymphaea	7	-0.97	0.729	-0.989
Nyssa	3	-0.874	0.89	-0.846
Ochlandra	2	-0.68	0.707	-0.645
Ochrosia	4	-0.944	0.948	-0.927
Ocimum	7	-0.864	0.736	-0.884
Ocotea	8	-0.085	-0.464	-0.582
Odontonema	3	-0.874	-0.583	-0.958
Oenanthe	3	-0.611	0.635	-0.747
Oenocarpus	2	0.393	-0.237	0.393
Oenothera	10	-0.983	-0.092	-0.998
Oldenlandia	5	-0.983	-0.896	-0.997
Olea	3	-0.874	0.996	-0.238
Olearia	10	-1	-0.989	-1
Onobrychis	6	-0.986	0.966	-0.996
Ononis	2	0.393	-0.237	0.393
Onopordum	2	-0.68	0.837	-0.488
Onosma	3	-0.874	-0.583	-0.958
Oophytum	2	-0.68	-0.237	-0.867
Operculina	2	-0.68	0.707	-0.645
Ophiopogon	3	-0.874	0.818	-0.889
Oplopanax	2	-0.68	0.707	-0.645
Opuntia	20	-0.866	0.874	-0.683
Oreocereus	2	-0.68	-0.237	-0.867
Origanum	5	-0.961	0.964	-0.914
Ornithogalum	7	-1	0.994	-0.999
Ornithopus	2	-0.68	0.837	-0.488
Orobanche	2	-0.68	-0.237	-0.867
Orthrosanthus	2	-0.68	-0.237	-0.867
Oryza	4	-0.031	0.568	0.282
Osmanthus	5	-0.983	0.987	-0.899
Oxalis	9	-0.706	0.542	-0.748
Ozothamnus	4	-0.944	-0.792	-0.989
Pachira	3	-0.733	0.861	-0.634
Pachypodium	9	-0.999	-0.991	-1
Pachyrhizus	3	-0.874	0.961	-0.688
Pachysandra	2	-0.68	-0.237	-0.867
Pachystachys	3	-0.874	-0.583	-0.958
Paeonia	14	-1	0.998	-1
Palaquium	12	-1	0.998	-1
Paliurus	2	-0.68	0.707	-0.645
Panax	8	-0.999	0.996	-0.998
Pandanus	11	-0.426	0.214	-0.583
Pandorea	2	-0.68	-0.237	-0.867
Panicum	19	-0.998	0.98	-0.998
Papaver	9	-0.998	0.998	-0.954
Paphiopedilum	5	-0.983	-0.896	-0.997
Papilionanthe	2	-0.68	-0.237	-0.867
Parietaria	3	-0.874	-0.583	-0.958
Parinari	2	0.393	-0.237	0.393
Paris	2	-0.68	0.837	-0.488
Parkia	4	-0.2	0.221	-0.385
Parmentiera	2	0.393	-0.237	0.393
Parthenium	2	0.393	-0.237	0.393
Parthenocissus	4	-0.944	0.933	-0.949
Paspalum	12	-0.98	0.962	-0.972
Passiflora	27	-1	0.998	-1
Paullinia	3	-0.611	0.635	-0.747
Paulownia	2	-0.68	0.707	-0.645
Pedicularis	7	-1	-0.962	-1
Pelargonium	11	-0.966	0.904	-0.98
Peltandra	2	-0.68	-0.237	-0.867
Peltogyne	2	-0.68	-0.237	-0.867
Peltophorum	3	-0.669	0.579	-0.802
Penstemon	6	-0.993	0.944	-0.999
Pentaclethra	2	-0.68	0.594	-0.734
Peperomia	12	-1	0.99	-1
Pereskia	2	-0.68	0.616	-0.728
Pericallis	2	-0.68	-0.237	-0.867
Pericopsis	2	-0.68	-0.237	-0.867
Periploca	5	-0.807	0.5	-0.87
Persea	3	0.76	-0.583	0.76
Persicaria	12	-0.894	0.362	-0.982
Petasites	4	-0.745	0.574	-0.789
Petunia	3	-0.874	-0.583	-0.958
Peucedanum	6	-0.993	0.944	-0.999
Pfaffia	2	-0.68	-0.237	-0.867
Phacelia	3	-0.611	0.305	-0.802
Phalaris	6	-0.95	0.936	-0.903
Phaseolus	5	-0.944	0.946	-0.91
Phedimus	4	-0.944	-0.792	-0.989
Phellodendron	2	-0.68	0.837	-0.488
Philadelphus	3	-0.874	0.916	-0.802
Phillyrea	2	-0.68	-0.237	-0.867
Philodendron	12	-1	0.998	-1
Phleum	3	-0.874	0.961	-0.688
Phlogacanthus	2	-0.68	-0.237	-0.867
Phlomis	2	-0.68	0.707	-0.645
Phlox	6	-0.993	-0.95	-1
Phoenix	8	-0.998	0.996	-0.903
Photinia	4	-0.944	-0.792	-0.989
Phyla	3	-0.087	-0.583	-0.458
Phyllanthus	13	-0.989	0.981	-0.963
Phyllocladus	3	-0.874	0.818	-0.889
Phyllodoce	4	-0.944	-0.792	-0.989
Phyllostachys	29	-0.998	0.958	-1
Phymosia	2	-0.68	-0.237	-0.867
Physalis	8	-0.996	0.992	-0.98
Physaria	3	-0.087	0.444	0.17
Physocarpus	5	-0.983	-0.896	-0.997
Phytelephas	2	-0.294	-0.237	-0.488
Phytolacca	6	-0.898	0.756	-0.936
Picea	20	-1	0.998	-1
Picrasma	2	-0.294	0.577	-0.366
Pieris	3	-0.874	-0.583	-0.958
Pilea	5	0.506	-0.896	-0.062
Pilocarpus	3	-0.874	-0.583	-0.958
Pilosella	2	0.393	-0.237	0.393
Pimenta	2	-0.68	0.616	-0.728
Pimpinella	4	-0.669	0.586	-0.609
Pinanga	2	0.393	-0.237	0.393
Pinus	75	-1	0.998	-1
Piper	17	-0.933	0.736	-0.98
Pistacia	6	-0.748	0.724	-0.707
Pisum	3	-0.874	0.942	-0.747
Pitcairnia	3	-0.874	-0.583	-0.958
Pithecellobium	2	-0.68	0.994	-0.225
Pittosporum	7	-0.979	0.858	-0.97
Plantago	9	-0.985	0.874	-0.994
Platanus	2	-0.294	0.577	-0.366
Platymiscium	2	-0.68	0.707	-0.645
Plectranthus	9	-0.98	0.98	-0.897
Pleioblastus	4	-0.944	-0.792	-0.989
Pluchea	2	-0.68	-0.237	-0.867
Plukenetia	2	-0.68	-0.237	-0.867
Plumbago	4	-0.944	0.874	-0.966
Plumeria	3	-0.874	-0.583	-0.958
Poa	18	-0.984	0.878	-0.996
Podocarpus	9	-0.979	0.8	-0.994
Podophyllum	2	-0.68	-0.237	-0.867
Pogostemon	5	-0.907	0.697	-0.938
Polemonium	2	-0.68	0.707	-0.645
Poliomintha	2	-0.68	-0.237	-0.867
Polygala	11	0.087	-0.914	-0.806
Polygonatum	10	-0.996	0.966	-0.998
Polygonum	3	-0.748	0.764	-0.846
Polyscias	5	-0.951	0.919	-0.983
Populus	22	-0.996	0.986	-0.998
Portlandia	2	-0.68	-0.237	-0.867
Portulaca	3	-0.669	0.818	-0.458
Potamogeton	5	-0.643	-0.896	-0.938
Potentilla	5	-0.983	0.935	-0.993
Pothos	2	-0.68	-0.237	-0.867
Pouteria	12	-0.857	-0.71	-0.998
Prangos	3	-0.087	0.137	-0.098
Premna	5	-0.983	-0.896	-0.997
Primula	30	-1	0.998	-1
Prinsepia	2	-0.68	0.707	-0.645
Proboscidea	2	0.393	-0.237	0.393
Prosopis	15	-0.944	0.916	-0.9
Protea	9	-0.999	-0.991	-1
Prumnopitys	4	-0.944	0.874	-0.966
Prunus	64	-1	0.998	-1
Pseudognaphalium	2	-0.68	-0.237	-0.867
Pseudogynoxys	2	-0.68	-0.237	-0.867
Pseudosasa	3	-0.874	0.713	-0.914
Psidium	5	-0.928	0.935	-0.799
Psophocarpus	2	0.393	-0.237	0.393
Psychotria	2	-0.68	-0.237	-0.867
Pterocarpus	10	-0.998	0.998	-0.992
Pterospermum	2	0.393	-0.237	0.393
Pterygota	2	0.393	-0.237	0.393
Ptychopetalum	2	-0.68	-0.237	-0.867
Ptychosperma	2	-0.68	-0.237	-0.867
Puccinellia	3	-0.546	0.321	-0.688
Pueraria	2	-0.68	0.959	-0.303
Pulmonaria	9	-0.999	0.994	-1
Purshia	2	-0.68	-0.237	-0.867
Puya	3	-0.874	-0.583	-0.958
Pyracantha	5	-0.983	-0.896	-0.997
Pyrola	2	-0.68	-0.237	-0.867
Pyrus	9	-0.19	0.154	-0.229
Quercus	43	-1	0.996	-1
Quesnelia	2	-0.68	-0.237	-0.867
Ramonda	2	-0.68	-0.237	-0.867
Ranunculus	9	-0.976	0.84	-0.991
Raphanus	2	-0.68	0.959	-0.303
Raphia	4	-0.2	0.372	-0.23
Rauvolfia	5	-0.983	0.972	-0.983
Reevesia	2	-0.68	-0.237	-0.867
Rehmannia	2	0.393	-0.237	0.393
Reseda	2	0.393	-0.237	0.393
Reynoutria	2	0.393	-0.237	0.393
Rhamnus	4	0.741	-0.304	0.741
Rhapis	2	-0.68	-0.237	-0.867
Rheum	9	-0.792	0.614	-0.84
Rhipsalis	4	-0.944	-0.792	-0.989
Rhizophora	3	-0.733	0.777	-0.747
Rhodanthe	3	-0.874	-0.583	-0.958
Rhododendron	66	-1	0.998	-1
Rhus	7	-0.858	0.478	-0.94
Rhynchosia	6	0.944	-0.95	0.929
Rhynchospora	2	0.393	-0.237	0.393
Ribes	16	-0.948	0.866	-0.966
Ricinodendron	2	-0.358	0.552	-0.645
Robinia	2	-0.68	0.994	-0.225
Romulea	2	-0.68	0.707	-0.645
Rosa	25	-1	0.998	-1
Roscoea	6	-0.993	-0.95	-1
Rotheca	3	-0.087	-0.583	-0.458
Roystonea	2	-0.68	0.837	-0.488
Rubia	2	-0.68	0.616	-0.728
Rubus	34	-0.994	0.924	-1
Rudbeckia	6	-0.96	0.798	-0.997
Ruellia	3	-0.874	-0.583	-0.958
Rumex	11	-0.915	0.747	-0.938
Ruscus	3	-0.874	0.818	-0.889
Ruta	2	-0.68	0.959	-0.303
Rytidosperma	8	-0.999	-0.966	-1
Sabal	4	-0.944	0.874	-0.966
Saccharum	7	-0.403	0.348	-0.422
Sagina	3	-0.087	-0.583	-0.458
Sagittaria	4	-0.031	-0.792	-0.636
Salacca	2	-0.68	-0.237	-0.867
Salicornia	2	-0.68	0.707	-0.645
Salix	101	-1	0.998	-1
Salsola	3	0.76	-0.583	0.76
Salvia	27	-0.958	0.82	-0.992
Sambucus	8	-0.996	0.992	-0.974
Sanguisorba	3	-0.874	0.916	-0.802
Sannantha	2	-0.68	-0.237	-0.867
Santalum	3	-0.546	0.713	-0.098
Sapindus	3	-0.874	0.916	-0.802
Saponaria	2	-0.68	0.837	-0.488
Saraca	3	-0.669	0.579	-0.802
Sasa	7	-0.197	-0.962	-0.892
Sassafras	2	-0.68	0.707	-0.645
Satureja	2	-0.68	-0.237	-0.867
Sauromatum	2	0.393	-0.237	0.393
Saussurea	6	-0.993	0.984	-0.997
Saxifraga	2	0.393	-0.237	0.393
Scabiosa	2	-0.68	0.707	-0.645
Scadoxus	2	-0.68	-0.237	-0.867
Scaphium	2	-0.68	-0.237	-0.867
Schefflera	9	-0.94	0.593	-0.987
Schinopsis	3	-0.874	0.713	-0.914
Schinus	2	-0.68	0.616	-0.728
Schisandra	5	-0.881	0.42	-0.966
Schismus	2	-0.68	-0.237	-0.867
Schizanthus	2	-0.68	-0.237	-0.867
Schizostachyum	5	-0.727	0.33	-0.799
Schoenoplectus	5	-0.151	0.03	-0.257
Scilla	8	-0.999	0.992	-1
Scorzonera	2	0.393	-0.237	0.393
Scrophularia	5	-0.983	-0.896	-0.997
Scutellaria	11	-0.923	-0.505	-0.995
Secale	2	-0.68	0.959	-0.303
Sedum	18	-0.988	0.886	-1
Sehima	2	-0.68	-0.237	-0.867
Selenicereus	4	-0.944	0.874	-0.966
Sempervivum	8	-0.999	0.992	-1
Senecio	8	-0.371	-0.604	-0.872
Senegalia	7	-0.471	0.692	0.008
Senna	23	-0.994	0.984	-0.976
Sesamum	3	-0.874	0.995	-0.259
Sesbania	8	-0.882	0.888	-0.79
Seseli	2	-0.68	0.707	-0.645
Setaria	12	-1	0.994	-0.99
Shibataea	2	-0.68	0.707	-0.645
Shorea	4	-0.944	0.98	-0.718
Sicyos	2	-0.68	0.837	-0.488
Sida	6	-0.456	0.218	-0.587
Sideritis	2	-0.68	0.707	-0.645
Silene	15	-0.948	-0.776	-1
Silphium	2	-0.68	-0.237	-0.867
Sinapis	2	-0.68	0.994	-0.225
Sindora	7	-1	0.994	-0.999
Sinningia	2	-0.68	-0.237	-0.867
Sinobambusa	2	-0.68	-0.237	-0.867
Sium	3	-0.087	-0.583	-0.458
Skimmia	2	-0.68	0.837	-0.488
Smilax	9	-0.999	0.998	-0.998
Smyrnium	2	-0.68	-0.237	-0.867
Solanum	54	-0.888	0.33	-1
Solidago	8	-0.843	0.714	-0.905
Sonchus	2	-0.68	-0.237	-0.867
Sophora	8	-0.787	0.712	-0.761
Sorbus	12	-1	0.998	-0.994
Sorghastrum	2	-0.294	0.577	-0.366
Sorghum	6	-0.986	0.986	-0.926
Sparaxis	2	-0.68	-0.237	-0.867
Sparganium	4	-0.944	-0.792	-0.989
Spathiphyllum	3	-0.874	-0.583	-0.958
Sphaeralcea	3	-0.546	0.321	-0.688
Spigelia	2	-0.294	-0.237	-0.488
Spilanthes	2	-0.68	0.921	-0.366
Spiraea	10	-1	-0.989	-1
Spirodela	2	-0.68	-0.237	-0.867
Spondias	4	-0.853	0.893	-0.789
Sporobolus	18	-1	0.998	-1
Stachys	5	0.083	-0.286	-0.202
Stapelia	3	-0.874	-0.583	-0.958
Staphylea	2	-0.68	-0.237	-0.867
Stauntonia	2	-0.294	-0.237	-0.488
Stellaria	2	-0.68	0.837	-0.488
Stemona	4	-0.944	-0.792	-0.989
Stenocereus	5	-0.983	-0.896	-0.997
Stephania	3	-0.874	-0.583	-0.958
Sterculia	7	-0.702	0.822	-0.244
Stereospermum	2	-0.68	-0.237	-0.867
Stevia	2	-0.68	0.707	-0.645
Stewartia	4	-0.944	-0.792	-0.989
Stigmaphyllon	2	-0.68	-0.237	-0.867
Stipagrostis	3	-0.669	0.742	-0.688
Strelitzia	3	-0.874	-0.583	-0.958
Streptocarpus	3	-0.874	-0.583	-0.958
Strobilanthes	4	-0.372	0.092	-0.495
Strophanthus	10	-0.998	0.974	-0.998
Strychnos	9	-0.911	0.812	-0.939
Stylophorum	2	-0.68	-0.237	-0.867
Stylosanthes	9	-0.999	0.996	-1
Styrax	7	-0.618	0.801	-0.042
Suaeda	2	0.393	-0.237	0.393
Swertia	4	-0.372	-0.792	-0.789
Swietenia	3	-0.611	0.635	-0.747
Syagrus	4	-0.372	0.496	-0.23
Symphonia	2	-0.68	0.959	-0.303
Symphyotrichum	9	-0.998	0.994	-0.999
Symphytum	5	-0.983	0.994	-0.799
Symplocos	2	-0.68	-0.237	-0.867
Syncarpia	2	-0.68	0.837	-0.488
Syngonium	3	-0.874	-0.583	-0.958
Synsepalum	2	0.393	-0.237	0.393
Syringa	7	-0.996	0.993	-0.991
Syzygium	12	-0.625	0.722	-0.236
Tabebuia	3	-0.874	0.713	-0.914
Tabernaemontana	6	-0.537	0.204	-0.713
Tacca	3	-0.874	0.916	-0.802
Tagetes	6	-0.976	0.982	-0.882
Talinum	2	-0.294	-0.237	-0.488
Tamarix	7	-1	0.998	-0.926
Tanacetum	7	-0.966	0.948	-0.902
Taraxacum	3	-0.087	-0.583	-0.458
Taxillus	5	-0.983	-0.896	-0.997
Taxodium	2	-0.294	-0.237	-0.488
Taxus	5	-0.951	0.877	-0.992
Tecoma	3	-0.874	0.818	-0.889
Telfairia	2	-0.348	-0.237	-0.645
Tephrosia	7	-0.752	0.576	-0.826
Terminalia	13	-1	0.998	-0.959
Tetradium	2	0.393	-0.237	0.393
Teucrium	7	-0.952	0.711	-0.97
Thalictrum	12	-0.817	-0.996	-0.998
Themeda	2	0.393	-0.237	0.393
Theobroma	6	-0.993	0.998	-0.926
Thespesia	2	-0.68	0.946	-0.327
Thevetia	2	-0.68	0.707	-0.645
Thladiantha	2	-0.68	0.707	-0.645
Thlaspi	2	0.393	-0.237	0.393
Thrinax	2	-0.68	-0.237	-0.867
Thuja	3	-0.874	0.861	-0.864
Thunbergia	7	-1	-0.962	-1
Thymus	10	-0.966	0.794	-0.986
Tibouchina	3	-0.874	-0.583	-0.958
Tieghemella	2	-0.68	-0.237	-0.867
Tigridia	2	-0.68	-0.237	-0.867
Tilia	8	-0.99	0.984	-0.974
Tillandsia	6	-0.993	0.96	-0.998
Tinospora	3	-0.874	-0.583	-0.958
Tithonia	2	-0.68	0.707	-0.645
Tofieldia	2	-0.68	-0.237	-0.867
Toona	3	-0.748	0.77	-0.846
Torreya	3	-0.874	0.713	-0.914
Toxicodendron	4	-0.745	0.718	-0.659
Trachelospermum	2	-0.294	0.577	-0.366
Trachyspermum	2	-0.68	-0.237	-0.867
Tradescantia	11	-1	0.998	-1
Tragopogon	2	0.393	-0.237	0.393
Trema	4	-0.031	0.156	-0.156
Trevesia	2	-0.68	-0.237	-0.867
Trichilia	4	-0.878	0.935	-0.636
Trichloris	2	-0.68	0.707	-0.645
Trichosanthes	7	-1	0.99	-1
Tricyrtis	2	-0.68	-0.237	-0.867
Trifolium	34	-1	0.998	-1
Trigonella	3	-0.733	0.861	-0.634
Trillium	3	-0.669	0.579	-0.802
Tripsacum	2	-0.68	0.616	-0.728
Trisetum	2	-0.68	0.921	-0.366
Triticum	12	-1	0.998	-0.996
Trollius	6	-0.993	0.944	-0.999
Tropaeolum	7	-1	0.996	-0.99
Tsuga	8	-0.99	0.992	-0.964
Tulipa	12	-1	-0.996	-1
Turnera	3	-0.874	0.916	-0.802
Tylosema	2	-0.68	-0.237	-0.867
Typha	5	-0.951	0.96	-0.899
Uapaca	2	0.393	-0.237	0.393
Ulmus	12	-0.904	0.056	-0.992
Umbilicus	2	-0.68	-0.237	-0.867
Uncaria	7	-0.918	0.891	-0.877
Urceola	2	-0.68	0.707	-0.645
Urochloa	14	-0.943	0.122	-0.992
Ursinia	3	-0.874	-0.583	-0.958
Urtica	3	-0.874	0.818	-0.889
Uvaria	2	0.393	-0.237	0.393
Uvularia	2	-0.68	-0.237	-0.867
Vaccinium	20	-0.984	0.97	-0.992
Vachellia	9	-0.508	0.695	-0.006
Valeriana	6	-0.993	0.986	-0.996
Valerianella	2	-0.68	-0.237	-0.867
Vallisneria	2	-0.68	-0.237	-0.867
Vanda	3	-0.087	-0.583	-0.458
Vanilla	3	-0.874	0.818	-0.889
Vatica	2	-0.68	-0.237	-0.867
Veitchia	2	-0.68	-0.237	-0.867
Ventilago	2	0.393	-0.237	0.393
Veratrum	7	-0.98	0.982	-0.954
Verbascum	7	-0.881	0.037	-0.97
Verbena	8	-0.968	0.877	-0.979
Verbesina	2	0.393	-0.237	0.393
Vernicia	3	-0.874	0.942	-0.747
Vernonia	3	-0.087	-0.583	-0.458
Veronica	11	-0.842	-0.636	-0.993
Viburnum	17	-1	0.998	-1
Vicia	17	-1	0.998	-1
Victoria	2	-0.68	-0.237	-0.867
Vigna	15	-0.998	0.996	-1
Vinca	2	-0.68	-0.237	-0.867
Vincetoxicum	9	-0.999	0.997	-0.999
Viola	9	-0.931	0.892	-0.908
Virola	6	-0.91	0.586	-0.978
Viscum	2	-0.68	0.837	-0.488
Vitex	9	-0.925	0.748	-0.965
Vitis	12	-0.987	0.93	-0.99
Voacanga	2	-0.68	-0.237	-0.867
Volkameria	2	0.393	-0.237	0.393
Vriesea	7	-1	-0.962	-1
Warburgia	2	-0.68	0.707	-0.645
Washingtonia	2	-0.68	-0.237	-0.867
Watsonia	4	-0.944	-0.792	-0.989
Weigela	3	-0.874	-0.583	-0.958
Willughbeia	2	-0.68	0.616	-0.728
Wisteria	3	-0.874	0.713	-0.914
Wolffia	3	-0.874	0.713	-0.914
Wrightia	2	-0.68	0.837	-0.488
Xanthisma	2	-0.68	-0.237	-0.867
Xanthosoma	4	-0.783	0.417	-0.891
Xanthostemon	2	-0.68	-0.237	-0.867
Ximenia	2	-0.294	0.707	-0.214
Xylopia	3	-0.669	0.742	-0.688
Yucca	10	-0.96	0.588	-0.99
Yushania	8	-0.67	0.101	-0.881
Zamia	13	-1	0.998	-1
Zantedeschia	4	-0.944	0.874	-0.966
Zanthoxylum	10	-0.954	0.922	-0.898
Zea	2	-0.68	0.998	-0.218
Zelkova	4	-0.745	0.201	-0.905
Zephyranthes	5	-0.983	0.935	-0.993
Zingiber	4	-0.816	0.77	-0.722
Zinnia	2	-0.68	-0.237	-0.867
Zizania	2	-0.68	0.707	-0.645
Ziziphus	5	-0.569	0.862	0.244
Zoysia	5	-0.983	0.972	-0.983

## Sheet: βbenefits among confamiliars
Family	Richness	ES βsim	ES βnes	ES βsor
Acanthaceae	71	-0.994	0.418	-1
Achariaceae	5	-0.609	0.122	-0.781
Acoraceae	2	-0.655	0.787	-0.512
Actinidiaceae	5	-0.785	-0.073	-0.92
Adoxaceae	25	-1	0.998	-0.998
Aizoaceae	125	-1	0.998	-1
Alismataceae	15	-0.762	-0.942	-0.994
Alstroemeriaceae	4	-0.946	-0.798	-0.985
Altingiaceae	4	-0.83	0.894	-0.686
Amaranthaceae	73	-0.734	0.61	-0.832
Amaryllidaceae	117	-1	0.998	-1
Anacampserotaceae	2	-0.655	-0.268	-0.876
Anacardiaceae	62	-0.796	0.744	-0.666
Annonaceae	36	-0.63	0.536	-0.774
Apiaceae	153	-1	0.998	-1
Apocynaceae	189	-0.97	0.716	-1
Aponogetonaceae	3	-0.88	0.826	-0.883
Aquifoliaceae	24	-0.998	0.994	-0.976
Araceae	101	-1	0.944	-1
Araliaceae	64	-1	0.998	-1
Araucariaceae	14	-0.996	0.974	-0.998
Arecaceae	190	-0.846	0.726	-0.918
Argophyllaceae	3	-0.88	-0.633	-0.961
Aristolochiaceae	33	-0.998	0.134	-1
Asparagaceae	169	-1	0.998	-1
Asphodelaceae	27	-1	0.988	-1
Asteraceae	485	-1	0.964	-1
Atherospermataceae	2	-0.655	0.847	-0.428
Balanophoraceae	3	-0.029	0.033	-0.081
Balsaminaceae	8	-0.888	-0.082	-0.992
Basellaceae	4	-0.889	0.922	-0.864
Begoniaceae	21	-0.998	-1	-1
Berberidaceae	45	-1	0.998	-1
Betulaceae	41	-0.99	0.986	-0.984
Bignoniaceae	57	-0.984	0.382	-1
Bixaceae	3	-0.411	-0.633	-0.61
Boraginaceae	105	-1	0.992	-1
Brassicaceae	91	-0.996	0.99	-0.982
Bromeliaceae	65	-1	0.998	-1
Burseraceae	43	-0.998	0.994	-0.996
Buxaceae	7	-0.97	0.946	-0.938
Cabombaceae	2	-0.655	-0.268	-0.876
Cactaceae	162	-1	0.998	-1
Calophyllaceae	26	-1	0.998	-1
Calycanthaceae	3	-0.493	0.517	-0.448
Campanulaceae	56	-1	0.998	-1
Canellaceae	3	-0.649	0.732	-0.658
Cannabaceae	17	-0.382	0.322	-0.334
Cannaceae	7	-0.976	0.976	-0.89
Capparaceae	13	-0.009	0.174	0.1
Caprifoliaceae	44	-0.824	0.242	-1
Caricaceae	5	-0.974	0.975	-0.961
Caryocaraceae	5	-0.25	-0.232	-0.597
Caryophyllaceae	53	-1	0.954	-1
Casuarinaceae	4	-0.756	0.721	-0.723
Celastraceae	20	-0.982	0.918	-0.988
Cercidiphyllaceae	2	-0.655	-0.268	-0.876
Chloranthaceae	3	-0.76	0.203	-0.922
Chrysobalanaceae	15	-0.09	-0.556	-0.738
Cistaceae	15	-0.982	0.97	-0.974
Cleomaceae	5	0.214	-0.014	0.436
Clethraceae	4	-0.946	-0.798	-0.985
Clusiaceae	29	-0.99	0.984	-0.984
Colchicaceae	9	-0.998	0.99	-1
Combretaceae	26	-0.976	0.984	-0.748
Commelinaceae	27	-1	0.86	-1
Connaraceae	3	-0.88	0.826	-0.883
Convolvulaceae	56	-0.854	0.418	-0.994
Coriariaceae	3	-0.557	-0.633	-0.845
Cornaceae	24	-0.887	0.68	-0.958
Costaceae	2	-0.655	0.847	-0.428
Crassulaceae	84	-1	0.998	-1
Cucurbitaceae	59	-1	0.998	-1
Cunoniaceae	4	-0.946	0.956	-0.925
Cupressaceae	69	-1	0.998	-1
Cycadaceae	5	-0.974	0.975	-0.961
Cyclanthaceae	2	0.415	-0.268	0.415
Cyperaceae	80	-0.016	-0.17	-0.478
Daphniphyllaceae	2	-0.655	-0.268	-0.876
Dilleniaceae	5	0.501	-0.279	0.502
Dioscoreaceae	27	-0.992	0.912	-1
Dipterocarpaceae	35	-1	0.998	-1
Droseraceae	7	-0.984	0.952	-0.996
Ebenaceae	27	-1	0.998	-1
Elaeagnaceae	11	-0.996	0.994	-0.932
Elaeocarpaceae	9	-0.761	0.782	-0.621
Ephedraceae	14	-1	0.998	-1
Ericaceae	166	-1	0.998	-1
Erythroxylaceae	3	-0.493	0.517	-0.448
Escalloniaceae	3	-0.88	-0.633	-0.961
Euphorbiaceae	148	-0.956	0.96	-0.668
Fabaceae	883	0.626	0.718	0.998
Fagaceae	65	-1	0.998	-1
Garryaceae	3	-0.649	0.732	-0.658
Gentianaceae	31	-0.984	0.87	-0.998
Geraniaceae	26	-0.998	0.986	-1
Gesneriaceae	42	-1	-1	-1
Gnetaceae	4	-0.946	0.869	-0.952
Griseliniaceae	2	-0.655	-0.268	-0.876
Grossulariaceae	16	-0.958	0.846	-0.962
Haemodoraceae	7	-0.906	-0.958	-0.994
Haloragaceae	3	-0.88	-0.633	-0.961
Hamamelidaceae	14	-1	0.982	-0.998
Heliconiaceae	12	-1	0.998	-1
Humiriaceae	3	-0.88	-0.633	-0.961
Hydrangeaceae	17	-0.998	0.996	-0.998
Hydrocharitaceae	7	-0.996	0.971	-0.998
Hypericaceae	14	-0.125	-0.106	-0.426
Hypoxidaceae	5	0.501	-0.894	-0.057
Icacinaceae	3	-0.029	-0.633	-0.448
Iridaceae	68	-1	0.998	-1
Irvingiaceae	3	-0.88	0.758	-0.916
Juglandaceae	26	-0.992	0.98	-0.992
Juncaceae	5	0.734	-0.344	0.727
Krameriaceae	4	-0.946	-0.798	-0.985
Lamiaceae	245	-1	0.998	-1
Lardizabalaceae	7	-0.875	0.108	-0.968
Lauraceae	71	-0.972	0.898	-0.986
Lecythidaceae	14	-0.501	-0.142	-0.886
Lentibulariaceae	2	-0.655	-0.268	-0.876
Liliaceae	59	-1	0.684	-1
Limnanthaceae	2	-0.655	0.847	-0.428
Linaceae	9	-0.714	0.846	-0.146
Linderniaceae	2	0.415	-0.268	0.415
Loasaceae	3	-0.029	-0.633	-0.448
Loganiaceae	12	-0.951	0.82	-0.982
Loranthaceae	7	-0.996	-0.958	-0.999
Lythraceae	21	-0.978	0.926	-0.994
Magnoliaceae	42	-1	0.996	-1
Malpighiaceae	21	0.173	-0.76	-0.712
Malvaceae	168	-0.992	0.994	-0.782
Marantaceae	8	0.604	-0.214	0.755
Martyniaceae	4	0.752	-0.535	0.653
Melanthiaceae	16	-0.998	0.996	-0.996
Melastomataceae	16	-0.903	0.124	-0.992
Meliaceae	46	-1	0.998	-0.998
Melianthaceae	4	-0.65	0.374	-0.723
Menispermaceae	21	-0.949	-0.208	-1
Menyanthaceae	2	-0.655	0.676	-0.629
Metteniusaceae	2	0.415	-0.268	0.415
Molluginaceae	4	-0.946	-0.798	-0.985
Montiaceae	8	-0.953	-0.971	-1
Moraceae	87	0.352	-0.146	0.678
Moringaceae	3	-0.649	0.68	-0.709
Musaceae	17	-0.618	0.316	-0.799
Myricaceae	7	-0.099	0.387	0.154
Myristicaceae	9	-0.942	0.982	-0.413
Myrtaceae	184	-0.348	0.334	-0.438
Nartheciaceae	2	-0.239	-0.268	-0.428
Nelumbonaceae	2	-0.655	0.981	-0.204
Nothofagaceae	8	-0.996	0.902	-0.999
Nyctaginaceae	8	-0.852	0.688	-0.925
Nymphaeaceae	13	-0.997	0.97	-0.996
Nyssaceae	5	-0.91	0.92	-0.73
Ochnaceae	5	-0.689	0.868	0.09
Olacaceae	9	-0.864	0.974	0.195
Oleaceae	68	-1	0.998	-1
Onagraceae	28	-1	0.672	-1
Opiliaceae	3	-0.029	-0.633	-0.448
Orchidaceae	135	-1	-0.998	-1
Orobanchaceae	19	-0.905	-0.662	-1
Oxalidaceae	12	-0.581	0.238	-0.802
Paeoniaceae	14	-1	0.996	-1
Pandanaceae	11	-0.418	0.26	-0.59
Papaveraceae	51	-1	0.998	-1
Passifloraceae	31	-1	0.992	-1
Pedaliaceae	6	-0.452	0.742	0.17
Pentaphylacaceae	4	-0.387	-0.798	-0.805
Phyllanthaceae	40	-0.54	0.244	-0.86
Phytolaccaceae	10	-0.893	0.78	-0.914
Picrodendraceae	2	0.415	-0.268	0.415
Pinaceae	141	-1	0.998	-1
Piperaceae	29	-0.608	0.136	-0.912
Pittosporaceae	9	-0.996	0.928	-1
Plantaginaceae	64	-0.996	0.396	-1
Platanaceae	2	-0.239	0.501	-0.303
Plumbaginaceae	21	-0.992	0.54	-1
Poaceae	697	-1	0.996	-1
Podocarpaceae	26	-1	0.994	-1
Polemoniaceae	15	-0.996	0.018	-1
Polygalaceae	11	0.084	-0.921	-0.805
Polygonaceae	59	-0.98	0.914	-0.994
Pontederiaceae	5	-0.25	0.263	-0.316
Portulacaceae	3	-0.649	0.826	-0.448
Potamogetonaceae	5	-0.609	-0.894	-0.92
Primulaceae	57	-1	0.972	-1
Proteaceae	58	-1	0.998	-1
Putranjivaceae	2	-0.655	0.847	-0.428
Ranunculaceae	160	-1	0.998	-1
Resedaceae	2	0.415	-0.268	0.415
Rhamnaceae	37	-0.108	0.3	0.288
Rhizophoraceae	4	0.241	-0.042	0.072
Rosaceae	284	-1	0.998	-1
Rubiaceae	96	-0.228	-0.174	-0.864
Rutaceae	82	-0.996	0.994	-0.96
Sabiaceae	3	-0.88	-0.633	-0.961
Salicaceae	134	-1	0.998	-1
Santalaceae	9	-0.782	0.848	-0.383
Sapindaceae	73	-1	0.998	-1
Sapotaceae	52	-1	0.998	-1
Saururaceae	2	-0.655	0.847	-0.428
Saxifragaceae	12	-0.785	0.168	-0.97
Schisandraceae	11	-0.917	0.798	-0.953
Scrophulariaceae	45	-1	0.998	-1
Simaroubaceae	12	-0.952	0.962	-0.807
Smilacaceae	9	-1	0.998	-1
Solanaceae	140	-0.992	0.83	-1
Staphyleaceae	2	-0.655	-0.268	-0.876
Stemonaceae	4	-0.946	-0.798	-0.985
Strelitziaceae	5	-0.609	-0.894	-0.92
Styracaceae	8	-0.627	0.81	0.001
Symplocaceae	2	-0.655	-0.268	-0.876
Talinaceae	2	-0.239	-0.268	-0.428
Tamaricaceae	8	-1	0.998	-0.95
Taxaceae	9	-0.982	0.946	-0.957
Theaceae	14	-0.934	0.822	-0.954
Thymelaeaceae	31	-0.938	0.7	-0.992
Tofieldiaceae	2	-0.655	-0.268	-0.876
Tropaeolaceae	7	-0.996	0.992	-0.986
Typhaceae	9	-1	0.998	-1
Ulmaceae	18	-0.974	0.594	-0.998
Urticaceae	31	0.668	-0.918	-0.422
Verbenaceae	29	-0.996	0.984	-0.998
Violaceae	10	-0.946	0.9	-0.914
Vitaceae	29	-0.988	0.936	-0.998
Vochysiaceae	2	0.415	-0.268	0.415
Winteraceae	2	-0.239	-0.268	-0.428
Zamiaceae	41	-1	0.998	-1
Zingiberaceae	65	-1	0.984	-1
Zygophyllaceae	10	-0.886	0.88	-0.657
